1                   **Inferring person-to-person networks of *Plasmodium falciparum* transmission:**  
2                                           **is routine surveillance data up to the task?**

3  
4       John H. Huber<sup>1\*</sup>, Michelle S. Hsiang<sup>2,3,4</sup>, Nomcebo Dlamini<sup>5</sup>, Maxwell Murphy<sup>6</sup>, Sibonakaliso  
5       Vilakati<sup>5</sup>, Nomcebo Nhlabathi<sup>5</sup>, Anita Lerch<sup>1</sup>, Rasmus Nielsen<sup>7</sup>, Nyasatu Ntshalintshali<sup>8</sup>,  
6                                           Bryan Greenhouse<sup>6,9</sup>, T. Alex Perkins<sup>1\*</sup>

7  
8       <sup>1</sup>Department of Biological Sciences, University of Notre Dame, Notre Dame, Indiana, United  
9       States of America

10       <sup>2</sup>Department of Pediatrics, University of Texas Southwestern Medical Center, Dallas, Texas,  
11       United States of America

12       <sup>3</sup>Malaria Elimination Initiative, Global Health Group, University of California, San Francisco,  
13       California, United States of America

14       <sup>4</sup>Department of Pediatrics, University of California, San Francisco, California, United States of  
15       America

16       <sup>5</sup>National Malaria Elimination Programme, Ministry of Health, Manzini, Eswatini

17       <sup>6</sup>Department of Medicine, University of California, San Francisco, California, United States of  
18       America

19       <sup>7</sup>Department of Integrative Biology and Statistics, University of California, Berkeley, California,  
20       United States of America

21       <sup>8</sup>Clinton Health Access Initiative, Eswatini Country Office, Mbabane, Eswatini

22       <sup>9</sup>Chan Zuckerberg Biohub, San Francisco, California, United States of America

23

24 \*Corresponding Authors

25 Email: [jhuber3@nd.edu](mailto:jhuber3@nd.edu) (JHH); [taperkins@nd.edu](mailto:taperkins@nd.edu) (TAP)

26

27 Short Title: Inferring person-to-person transmission networks

## 28 **Abstract**

29 Inference of person-to-person transmission networks using surveillance data is increasingly used  
30 to estimate spatiotemporal patterns of pathogen transmission. Several data types can be used to  
31 inform transmission network inferences, yet the sensitivity of those inferences to different data  
32 types is not routinely evaluated. We evaluated the influence of different combinations of spatial,  
33 temporal, and travel-history data on transmission network inferences for *Plasmodium falciparum*  
34 malaria. We found that these data types have limited utility for inferring transmission networks  
35 and may overestimate transmission. Only when outbreaks were temporally focal or travel  
36 histories were accurate was the algorithm able to accurately estimate the reproduction number  
37 under control,  $R_c$ . Applying this approach to data from Eswatini indicated that inferences of  $R_c$   
38 and spatiotemporal patterns therein depend upon the choice of data types and assumptions about  
39 travel-history data. These results suggest that transmission network inferences made with routine  
40 malaria surveillance data should be interpreted with caution.

## 41 **Introduction**

42 Concomitant with improved epidemiological surveillance, there is growing interest to leverage  
43 the collected data to infer transmission networks for a wide range of pathogens and to use those  
44 inferences to inform public health efforts. Past studies have incorporated temporal data<sup>1</sup> and  
45 spatial data<sup>2-5</sup> to estimate pairwise probabilities of transmission between individual cases and to  
46 use those estimates to infer time-varying and spatially varying reproduction numbers,  
47 respectively. More recently, methods have been developed to incorporate this type of detailed,  
48 individual-level epidemiological data<sup>6-8</sup> to infer transmission networks for infectious diseases of  
49 humans, including severe acute respiratory syndrome<sup>9</sup> and tuberculosis<sup>10</sup>, and of animals, such as  
50 rabies<sup>11</sup> and foot-and-mouth disease<sup>12</sup>.

51 In addition to the diseases for which these methods have been applied to date, there is a  
52 growing need to apply similar methods to malaria in near-elimination settings. As incidence of  
53 malaria declines within a country, transmission becomes more heterogeneous in space and  
54 time<sup>13</sup>. Focal areas of high transmission, known as "hotspots," pose a serious risk of fueling  
55 resurgence if left untargeted, potentially reversing decades of progress towards elimination<sup>14</sup>. To  
56 this end, granular estimates of when and where transmission occurs are needed, as spatially  
57 aggregated estimates may obscure important heterogeneities of practical relevance to control  
58 efforts<sup>15</sup>. In addition to characterizing details of local transmission, measurement of progress  
59 towards malaria elimination hinges on correct classification of cases as imported or locally  
60 acquired<sup>16,17</sup>, which is a byproduct of estimating transmission networks.

61 Previous work on malaria has made progress on the use of individual-level  
62 epidemiological data to infer transmission networks of *Plasmodium falciparum*, the parasite  
63 primarily responsible for human malaria in many regions of the world. Churcher *et al.*<sup>18</sup> used

64 temporal data to estimate the proportion of imported cases needed to confidently estimate the  
65 reproduction number under control,  $R_c$ , below one and thereby provide evidence of controlled,  
66 non-endemic malaria transmission. Reiner *et al.*<sup>6</sup> then built upon this work by incorporating  
67 spatial data and inferring an individual-level transmission network of *P. falciparum* in Eswatini.  
68 More recently, Routledge *et al.*<sup>19,20</sup> used related approaches to infer transmission networks and  
69  $R_c$  of *P. vivax* in El Salvador and China.

70 As the adoption of these methods increases, in particular for malaria, care should be taken  
71 to assess how the epidemiological setting and the inclusion or exclusion of certain data types  
72 might affect the accuracy of transmission network inferences, as well as resultant inferences  
73 about epidemiological quantities including  $R_c$  and spatiotemporal variation therein. A recent  
74 study by Campbell *et al.*<sup>21</sup> noted that epidemiological data alone was generally insufficient to  
75 reconstruct transmission networks of other pathogens, ranging from *Mycobacterium tuberculosis*  
76 to SARS-CoV. Although *P. falciparum* malaria was not considered in that analysis, its long  
77 serial interval<sup>22</sup> calls into the question the utility of epidemiological data for this purpose, though  
78 this has been largely unaddressed in past studies. Furthermore, past transmission network  
79 inferences for malaria have relied on various types of epidemiological data, ranging from the  
80 timing of symptom onset<sup>18-20</sup> to more detailed spatiotemporal data<sup>6</sup>. Each study incorporated  
81 travel-history information into transmission network inferences and considered these data to be  
82 perfectly accurate, assuming that all cases that reported travel were imported. However, travel  
83 history may be an imperfect indicator of importation owing to errors in recall<sup>17</sup> and the fact that  
84 travel to an area of ongoing transmission alone does not guarantee that an individual was  
85 infected there<sup>17,23</sup>. *P. falciparum* transmission network inferences are likely to be sensitive to the  
86 choice of data types<sup>24</sup>, and failure to evaluate the sensitivity of transmission network inferences

87 to choices about data types and different assumptions about possible errors in travel-history data  
88 could lead to apparently confident, though ultimately incorrect, assessments of *P. falciparum*  
89 transmission risk in near-elimination settings.

90 Here, we present a Bayesian method for inferring transmission networks based on  
91 temporal, spatial, and travel-history data for individual malaria cases. We use it to characterize  
92 the sensitivity of transmission network inferences to the inclusion of different data types and to  
93 different assumptions about the accuracy of travel histories. Our method builds upon previous  
94 work by leveraging individual-level epidemiological data to obtain posterior estimates of  
95 transmission networks and model parameters in a way that can accommodate different  
96 assumptions about errors in travel histories. After establishing a proof-of-concept of our  
97 inference method on simple test cases, we applied our method to real-world surveillance data  
98 from Eswatini and additional simulated data sets to understand how the inclusion or exclusion of  
99 different data types and different assumptions about travel-history error affect our ability to infer  
100 transmission networks and estimate transmission metrics, namely  $R_c$ .

101

## 102 **Results**

103 To establish proof-of-concept, we first applied our inference method on three simple test cases  
104 and evaluated how well our inferences recovered the true transmission networks. We then  
105 applied our method to surveillance data collected in Eswatini during 2013-2017. Our focus was  
106 less on understanding malaria epidemiology in Eswatini and more on understanding how  
107 epidemiological conclusions change with the inclusion or exclusion of different data types and  
108 different assumptions about travel histories. These inference settings used: (1) spatial and  
109 temporal data while estimating the accuracy of the travel history (default setting); (2) spatial and

110 temporal data while believing the travel history; (3) spatial and temporal data alone; (4) temporal  
111 data while estimating the accuracy of the travel history; and (5) temporal data while believing the  
112 travel history. To validate the inferences based on data from Eswatini, we simulated data  
113 generated using posterior parameter estimates obtained from the data from Eswatini and  
114 evaluated the ability of our inference method to recover the true transmission networks along  
115 with the underlying parameters on those simulated data. Finally, we performed a simulation  
116 sweep across different epidemiological settings to determine the range of conditions under which  
117 our inference method yielded reliable estimates of transmission. A full description of the  
118 analyses and additional results can be found in the Supplement.

119

## 120 **Application to Eswatini surveillance data**

121 We applied our method to surveillance data collected in Eswatini during 2013-2017. Under the  
122 default inference setting, we estimated the diffusion coefficient  $D$ , which quantifies the spatial  
123 spread of transmission, to be  $4.42 \text{ km}^2 \text{ day}^{-1}$  ( $2.92 - 6.18 \text{ km}^2 \text{ day}^{-1}$ ) (Fig 1A). This corresponded  
124 to a median inferred transmission distance of 13.0 km ( $0.0160 - 65.9 \text{ km}$ ), a median inferred  
125 serial interval of 47 days ( $-33 - 150 \text{ days}$ ) (Fig 2A & 2B), and median estimates of  $\tau_s$ , the  
126 probability that an imported case reported travel, of 0.61 ( $0.44 - 0.78$ ) compared to the prior  
127 distribution mean of 0.80 and  $\tau_l$ , the probability that a locally acquired case reported travel, of  
128 0.57 ( $0.53 - 0.61$ ) compared to the prior distribution mean of 0.20 (Fig 1B & 1C). That the 95%  
129 credible interval for  $\tau_s$  contained 0.50 indicated that our inference algorithm found limited use of  
130 travel-history data in discriminating between imported and locally acquired cases, because that  
131 implies that imported cases have equal probabilities of reporting or not reporting travel. The  
132 algorithm estimated the proportion of imported cases to be 0.052, corresponding to  $R_c = 0.95$ .

133 Mapping risk of importation and local transmission across Eswatini under the default inference  
 134 setting, we estimated consistently low risk of importation throughout the country and  
 135 transmission hotspots in the northeastern part of Eswatini, close to the border with Mozambique  
 136 (Fig 3A & 3B).  
 137

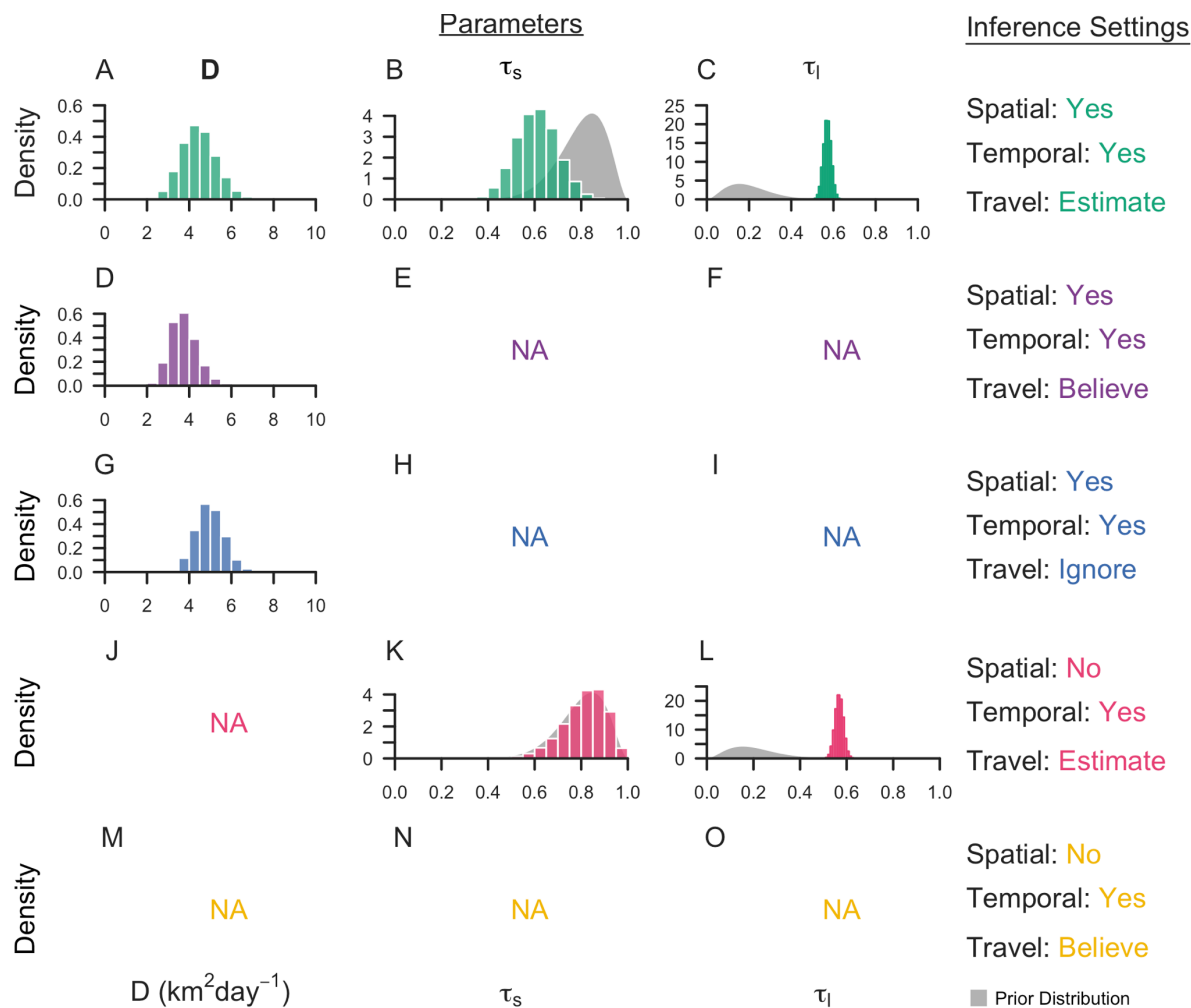

139 **Fig 1. Marginal posterior distributions of parameters from Eswatini surveillance data.**  
 140 Histograms represent the marginal posterior distribution of each parameter, color-coded by the  
 141 inference settings used.  $D$  is the diffusion coefficient with units  $\text{km}^2\text{day}^{-1}$ ,  $\tau_s$  is the probability that  
 142 an imported case reports travel, and  $\tau_l$  is the probability that a locally acquired case reports



143 *travel. Gray shapes represent the prior distributions placed on each parameter. Inference*  
 144 *settings in which a given parameter was not estimated are indicated by NA.*  
 145

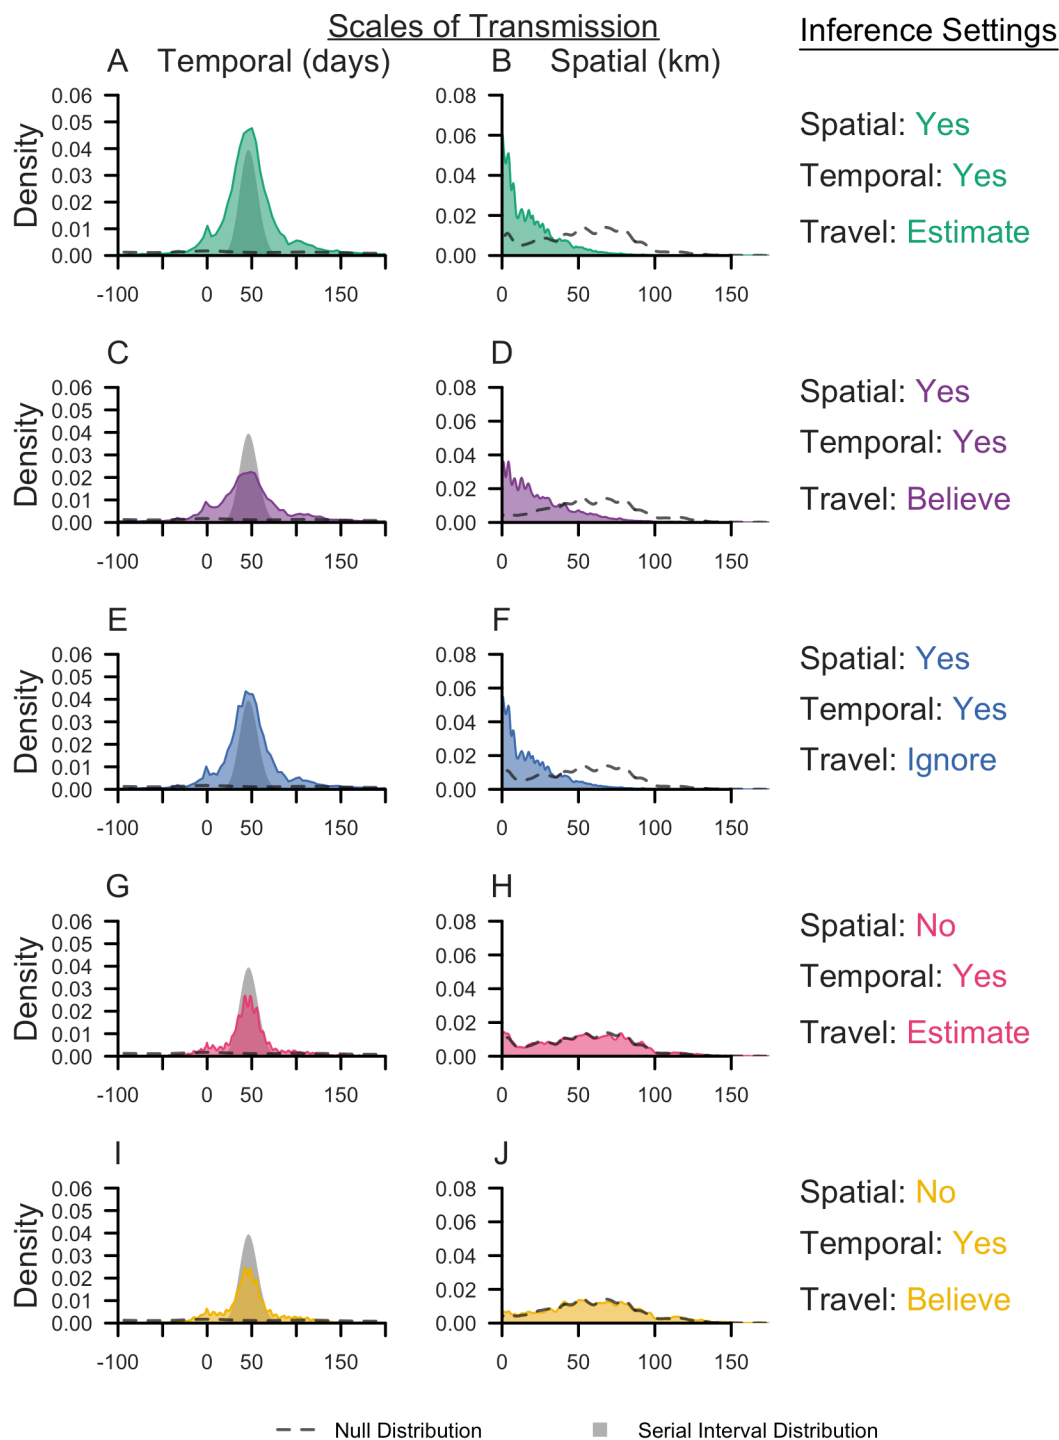

146

147 **Fig 2. Spatial and temporal scales of transmission in Eswatini.** Kernel density plots of the  
148 spatial (km) and temporal (days) scales of transmission are reported and color-coded for each  
149 inference setting. Dashed lines indicate the corresponding null distribution, generated from all  
150 random pairs of cases in the Eswatini surveillance data set. The null distribution was different if  
151 we believed the travel history, because classification of cases on the basis on travel history  
152 reduced the pairs of cases that could be randomly sampled. The grey shape is the serial interval  
153 distribution used in the likelihood.  
154

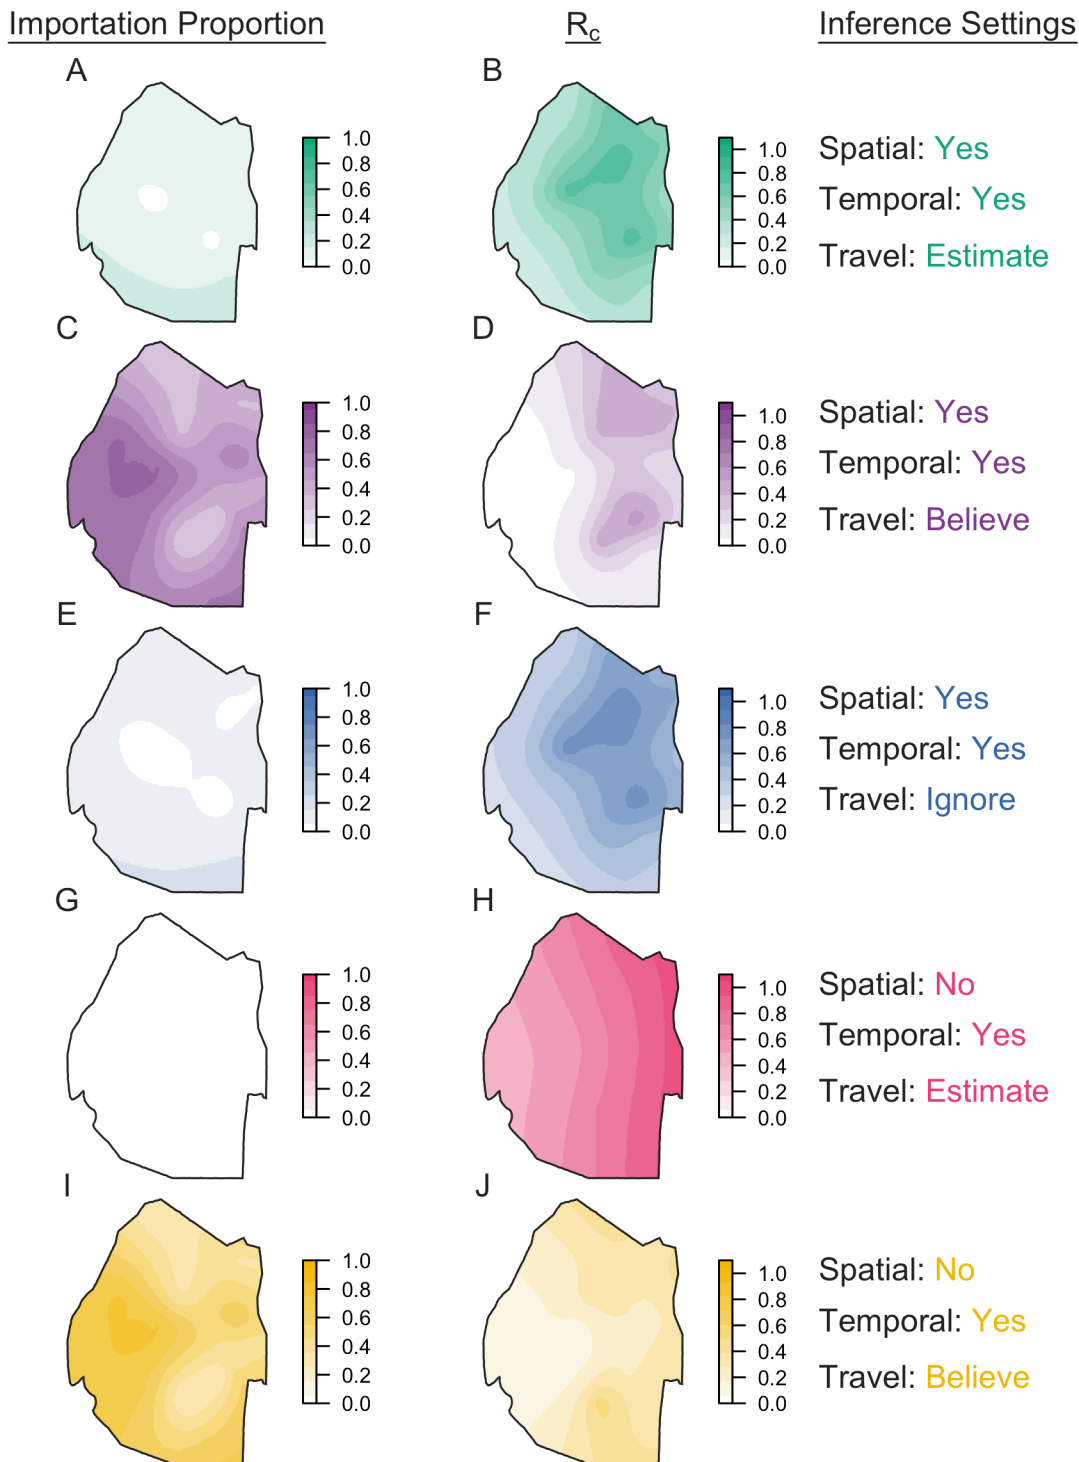

155

156 **Fig 3. Spatial distribution of importation and transmission risk in Eswatini. Maps of the**

157 **proportion of cases that are imported and the reproduction number under control ( $R_c$ ) were**

158 *generated for each inference setting using a generalized additive model with a Gaussian process*  
159 *basis function setting using the mgcv package in R<sup>25,26</sup>. In each plot, darker colors indicate*  
160 *greater importation or transmission risk.*

161  
162       Parameter estimates and transmission network inferences differed under other inference  
163 settings. When we believed the travel history, we estimated a larger median transmission  
164 distance (Fig 2D). We attribute this increase in the spatial scale of transmission to clusters of  
165 cases with positive travel histories located near metropolitan areas. By forcing those cases to be  
166 imported, the algorithm tended to infer transmission across longer distances to explain the  
167 origins of the remainder of cases that did not report travel and were thereby inferred to be locally  
168 acquired. With respect to time, all five inference settings produced consistent serial interval  
169 estimates, though the inclusion of spatial data allowed for a wider range of transmission linkages  
170 in time (Fig 2A, 2C, & 2E). Finally, in the absence of spatial data, the model estimated higher  
171 predictive power of travel histories in identifying imported cases ( $\tau_s$ : 0.83, [0.60, 0.95]), though  
172 the travel history was consistently found to be uninformative for identifying locally acquired  
173 cases ( $\tau_l$ : 0.57, [0.53, 0.60]) (Fig 1K & 1L).

174       Classification of cases as imported or locally acquired, key information for control  
175 programs, was sensitive to the choice of inference setting. The proportion of cases classified as  
176 imported was most sensitive to different assumptions about the accuracy of the travel histories  
177 (Fig 3, left column; Fig 4). Believing the travel history yielded high estimates of importation in  
178 western Eswatini (Fig 3C & 3I), whereas estimating or ignoring the travel history yielded low,  
179 relatively homogeneous estimates of importation risk (Fig 3A, 3E, & 3G). For instance, using  
180 temporal data and estimating the accuracy of the travel history produced probabilities of

181 importation that ranged 0.0043 – 0.0050, suggesting that nearly all cases resulted from local  
182 transmission (Figs 3G, 4D). Estimates of the spatial distribution of  $R_c$  depended most on the  
183 choice of which data types we included (Fig 3, right column). Notably, inclusion of spatial and  
184 temporal data produced a consistent spatial distribution of relative transmission risk, with  
185 transmission hotspots in northeastern Eswatini (Fig 3B, 3D, & 3F). However, believing the travel  
186 history reduced the magnitude of transmission that we inferred from a median  $R_c$  of 0.95 (Figs  
187 3B, 4A) under default settings to 0.41 (Figs 3D, 4B). Omitting spatial data changed the spatial  
188 distribution of transmission. Estimating the accuracy of the travel history yielded high  
189 transmission estimates (median  $R_c$ : 1.00) in eastern Eswatini (Fig 3H), whereas believing the  
190 travel history inferred hotspots of transmission (median  $R_c$ : 0.42) in southern Eswatini (Fig 3J).  
191 We note that believing the travel history led to slightly different median estimates of  $R_c$  (0.41 vs.  
192 0.42) depending upon whether spatial data was included, because the travel histories were  
193 unknown for 36 cases included in the analysis. As part of the inference procedure, the algorithm  
194 classified these cases as imported or locally acquired, and including spatial data caused a greater  
195 number of cases to be inferred to be imported.  
196

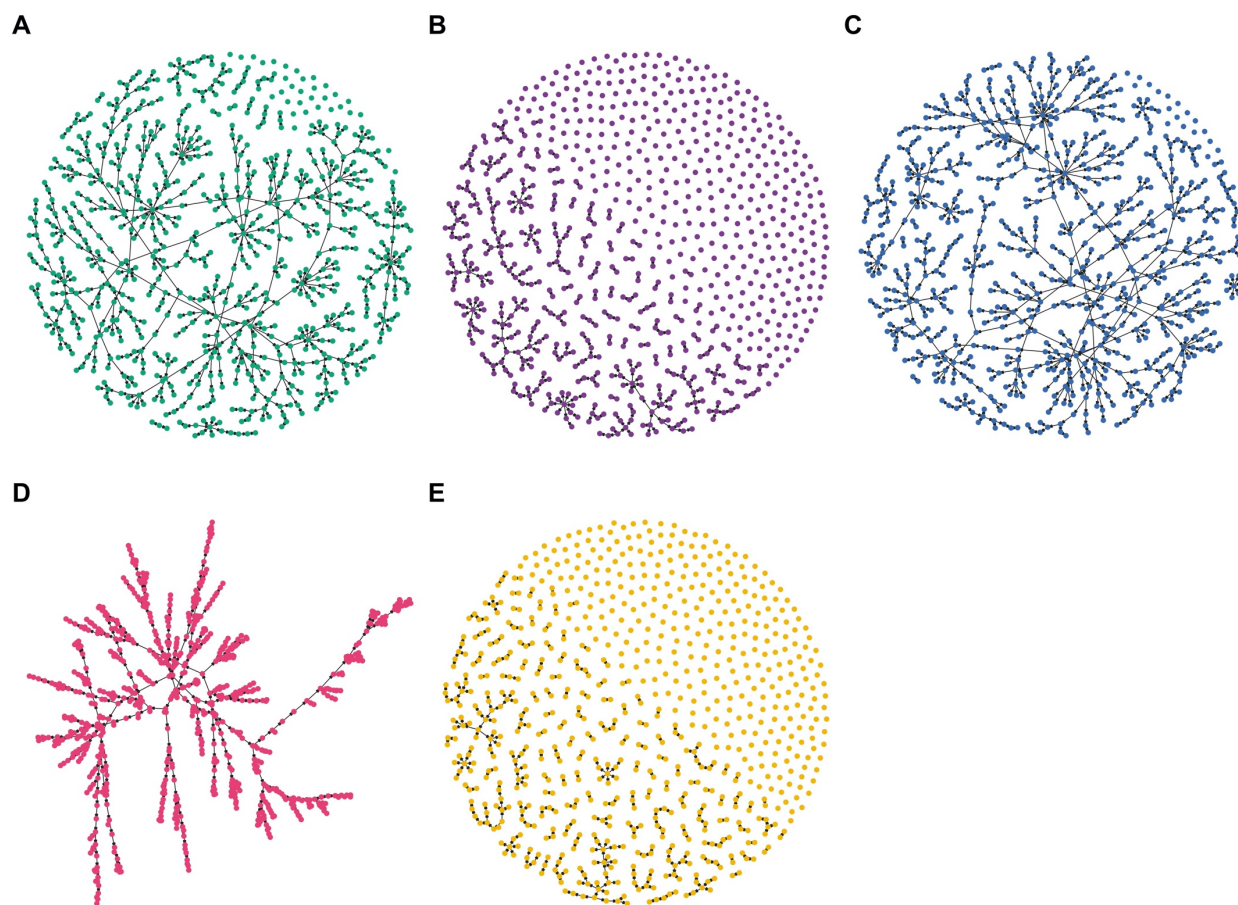

197

198 **Fig 4. Maximum a posteriori transmission networks in Eswatini.** The maximum a posteriori  
199 transmission networks (i.e., the transmission network in the posterior distribution with the  
200 highest likelihood) is shown for each inference setting: (A) spatial and temporal data while  
201 estimating the accuracy of the travel history; (B) spatial and temporal data while believing the  
202 travel history; (C) spatial and temporal data alone; (D) temporal data while estimating the  
203 accuracy of the travel history; and (E) temporal data while believing the travel history. In each  
204 transmission network, circles represent nodes, and arrows represent directed edges.

205

206 **Validation of inferences from Eswatini**

207 Reconciling the different inferences under different inference settings in Figs. 1-4 was  
 208 challenging because the true, underlying network and parameters were unknown. Using median  
 209 posterior estimates from the Eswatini data under each inference setting, we simulated data and  
 210 assessed the ability of the inference method to recover the underlying parameters and  
 211 transmission networks (Table 1). We found that the model was able to estimate  $\tau_s$  and  $\tau_l$   
 212 reasonably well, depending on the inference setting (Fig 5). One exception was that the  
 213 algorithm slightly overestimated  $\tau_s$  under the default inference setting. We attribute this to the  
 214 low proportion (0.052) of imported infections in the simulated data set and the strong prior  
 215 placed on this parameter. This tendency was not observed under the inference setting where  
 216 spatial data was excluded, because the true value of  $\tau_s$  closely matched the mean of the prior  
 217 distribution in that case (see the Supplement for further discussion).

218

219 **Table 1. Characteristics of simulated data generated using the branching process model.**

| Inference Setting |      |          | Network Size | # of Outbreaks | Prop. Imported | D    | $\tau_s$ | $\tau_l$ |
|-------------------|------|----------|--------------|----------------|----------------|------|----------|----------|
| Space             | Time | Travel   |              |                |                |      |          |          |
| Yes               | Yes  | Estimate | 775          | 43             | 0.052          | 4.42 | 0.61     | 0.57     |
| Yes               | Yes  | Believe  | 775          | 492            | 0.59           | 3.70 | 1        | 0        |
| Yes               | Yes  | No       | 775          | 36             | 0.043          | 4.96 | NA       | NA       |
| No                | Yes  | Estimate | 775          | 1              | 0.0013         | NA   | 0.83     | 0.57     |
| No                | Yes  | Believe  | 775          | 489            | 0.58           | NA   | 1        | 0        |

220 *A description of the simulated data used in the inference exercises are reported for each of the*  
 221 *five inference settings. The total number of nodes in the network, the number of distinct*  
 222 *outbreaks, the proportion of cases that are imported, and the underlying parameters are*  
 223 *provided.*

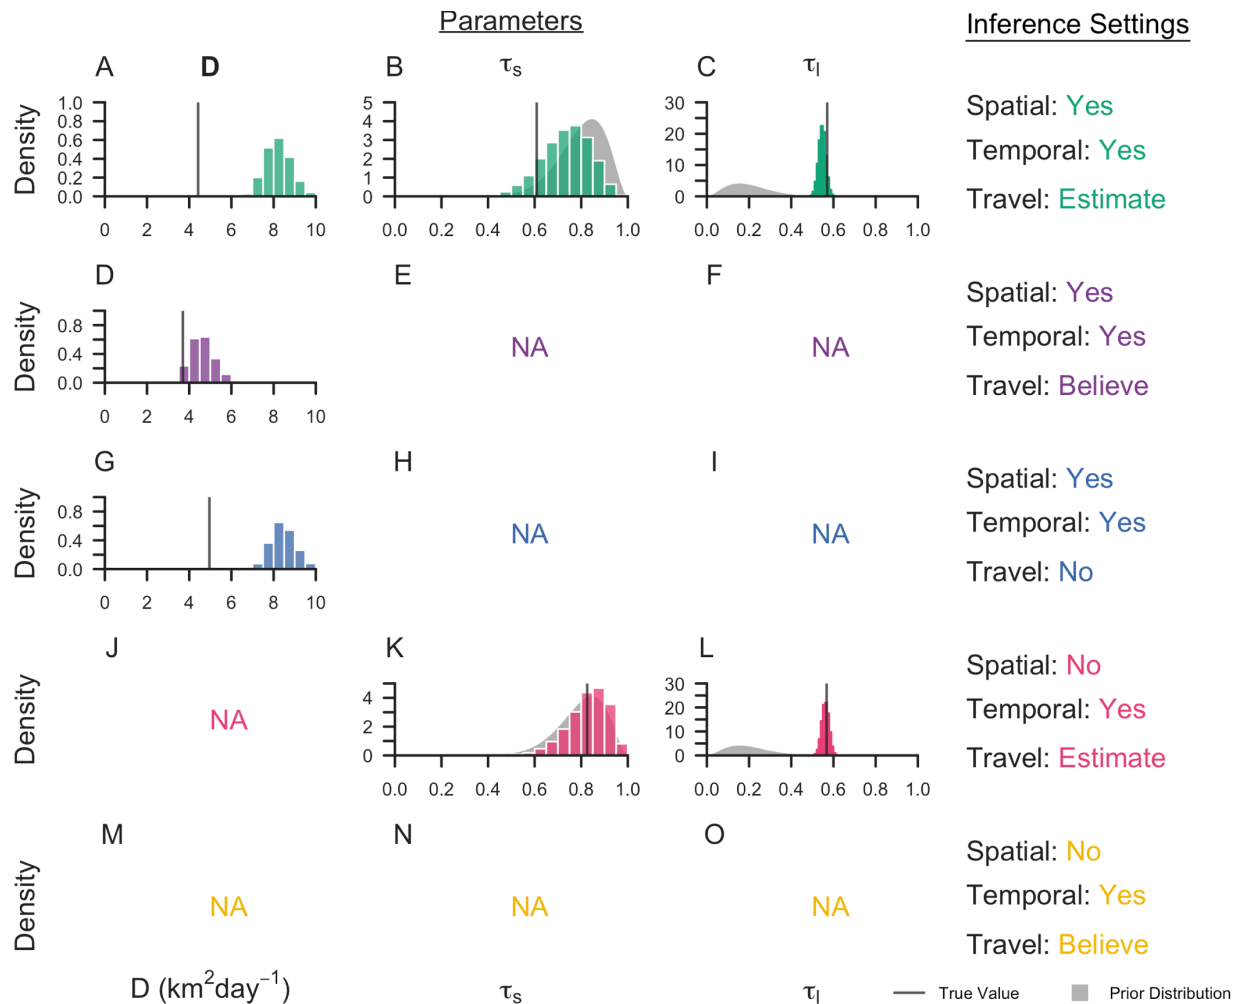

224 **Fig 5. Marginal posterior distributions for parameters inferred from simulated data.** The  
 225 marginal posterior distributions are reported for each inference setting from its respective  
 226 simulated data set. Each line denotes the true value of the parameter, and the grey shapes  
 227 represent the prior distributions of the parameters. Inference settings in which a given parameter  
 228 was not estimated are indicated by NA.

230  
 231 With the exception of believing the travel history, the model consistently overestimated  
 232 the diffusion coefficient (Fig 5A, 5D, & 5G). We attribute the challenge of correctly estimating  
 233 the diffusion coefficient to an inability to correctly estimate the underlying transmission network,



234 the extent of local transmission in the network, and a numerical insensitivity in the overall  
235 likelihood to changes in  $D$ . When we conditioned the likelihood of  $D$  on the true transmission  
236 network when  $R_c$  was high, the true values of  $D$  fell close to the range of maximum-likelihood  
237 estimates, suggesting that this parameter could be estimated correctly if the true network was  
238 identified (S3 Fig). The likelihood around the true value was very flat, however, making it easy  
239 for  $D$  to be estimated incorrectly. When  $R_c$  was low, we underestimated the diffusion coefficient,  
240 because the likelihood of imported cases increases as  $D$  decreases.

241 The overall accuracy of classifying cases as imported or locally acquired was close to one  
242 (Fig 6). Though seemingly promising, these high accuracies masked a tendency to overclassify  
243 cases as locally acquired, because many more cases were simulated to be locally acquired than  
244 imported. For example, under the default inference setting, the accuracy of correctly classifying  
245 imported cases was 0.023 (0.023 – 0.067). Similarly, the accuracies of identifying the parent of  
246 each transmission linkage were poor, despite simulating under the assumptions of the model,  
247 with accuracies ranging from 0.042 (0.022 – 0.065) when using temporal data and believing the  
248 travel history to 0.31 (0.28 – 0.34) when incorporating spatial and temporal data and estimating  
249 the accuracy of the travel history (Fig 6, circle points). This suggests that, as the number of cases  
250 increases within a fixed space-time window, the information content of routinely collected  
251 epidemiological data decreases and the method becomes incapable of correctly estimating the  
252 transmission network. Nevertheless, under some settings, the method was able to capture higher-  
253 order summaries of the network, such as case classification and  $R_c$  (Fig 6, square and diamond  
254 points).

255

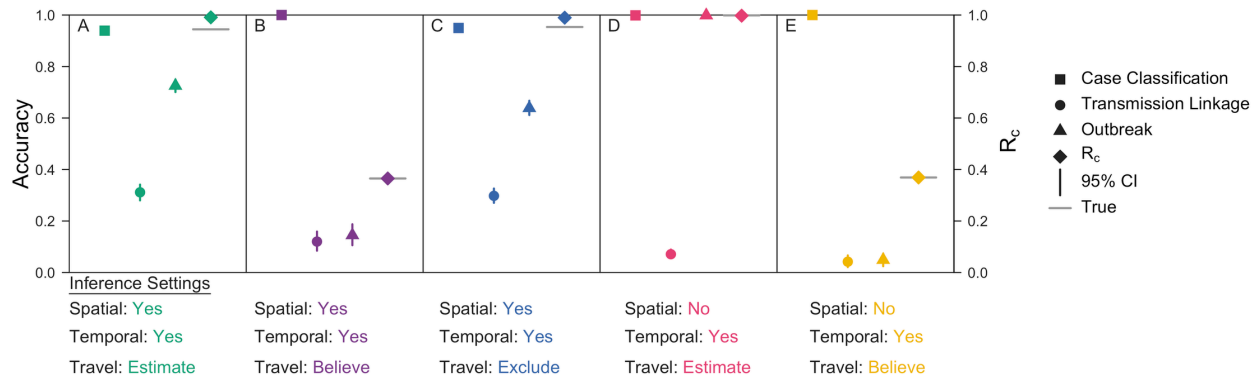

256  
 257 **Fig 6. Inference accuracies for validation exercises.** Accuracy metrics are reported for each  
 258 inference setting applied to its respective simulated data set. Case Classification, represented by  
 259 squares, refers to the proportion of cases that are correctly classified as imported or locally  
 260 acquired. Transmission Linkage, denoted by circles, is the proportion of locally acquired cases  
 261 for which the true parent is correctly identified. Outbreak, represented by triangles, is the  
 262 proportion of locally acquired cases for which the inferred parent belongs to the correct  
 263 outbreak. Bars denote the 95% credible intervals, and the grey line is the true  $R_c$  value of the  
 264 network.

265  
 266 **Simulation Sweep**

267 Validation of our inference algorithm revealed that its performance varied across simulated data  
 268 sets. When applied to a series of simple test cases in which the transmission networks were small  
 269 and in an optimal spatiotemporal arrangement, the inference method was able to reconstruct the  
 270 transmission network and correctly estimate  $R_c$  (S2 Fig). When applied to larger transmission  
 271 networks in which outbreaks overlapped in space and time, performance of the inference method  
 272 was poor (Fig 6). This indicated that the performance of our inference algorithm depends on the  
 273 epidemiological setting to which it is applied. To address this observation, we generated 2,000  
 274 simulated data sets in which we varied the proportion of imported cases, the spatiotemporal

275 window over which imported cases were distributed, the diffusion coefficient, and the accuracies  
276 of the travel history (i.e.,  $\tau_s$  and  $\tau_l$ ) (S2 Table). We then applied our inference algorithm under  
277 three different inference settings and quantified the accuracy of reconstructing each transmission  
278 network. The three inference settings used: (1) spatial and temporal data while estimating the  
279 accuracy of the travel history (default setting); (2) spatial and temporal data while believing the  
280 travel history; and (3) spatial and temporal data alone (S1 Table).

281 We observed that the accuracy of reconstructing transmission networks depended upon  
282 both the inference setting used and the epidemiological features of the simulated data. When we  
283 used spatial and temporal data and estimated the accuracy of the travel history or excluded it, the  
284 accuracy of reconstructing transmission networks depended on the relative proportion and  
285 temporal distribution of imported cases (S10 and S12 Figs). As the temporal window over which  
286 imported cases are distributed increased, the accuracy of identifying the true parent and the true  
287 outbreak of each locally acquired case increased. With an increasing temporal window,  
288 outbreaks within the transmission network became relatively more focal in time, which made the  
289 likelihoods of alternative transmission linkages more readily distinguishable. More accurate  
290 estimates of  $R_c$  under these inference settings similarly depended on the temporal window over  
291 which imported cases were distributed (Fig 7A, 7C). When the mean temporal interval between  
292 imported infections was greater than two times the mean length of the serial interval (i.e.,  
293 approximately 100 days), our estimates of  $R_c$  improved, though we generally overestimated it.  
294 Furthermore, as the proportion of imported cases increased and  $R_c$  decreased, the accuracy of  
295 identifying the correct outbreak of each locally acquired case decreased (S10 and S12 Figs). This  
296 pattern reflected the relationship between  $R_c$  and the size of individual outbreaks. As  $R_c$

297 decreased, the size of individual outbreaks decreased, and, consequently, the probability that the  
298 inferred parent of a locally acquired case belonged to the same outbreak decreased.

299

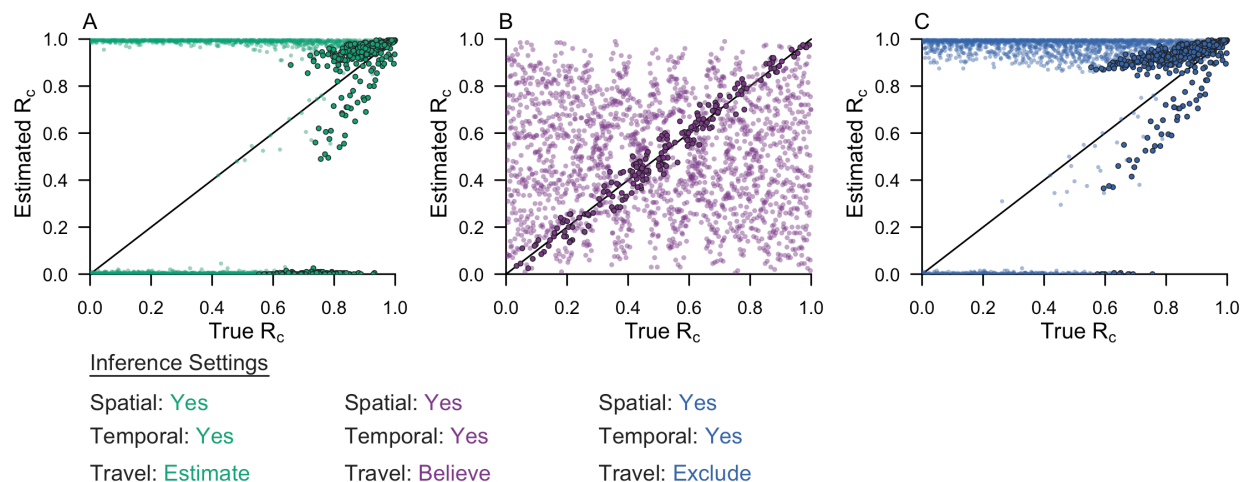

300

301 **Fig 7. Comparison of  $R_c$  estimates across inference settings.** The inference algorithm was  
302 applied to 2,000 simulated data sets. The estimated  $R_c$  is compared to the true  $R_c$  for each of the  
303 inference settings: (A) spatial and temporal data while estimating the accuracy of the travel  
304 history; (B) spatial and temporal data while believing the travel history; and (C) spatial and  
305 temporal data alone. Each point represents a simulated data set. The darker, accented points are  
306 simulated data sets with epidemiological features that improved performance. In (A) and (C), the  
307 darker, accented points were simulated data sets where the mean temporal interval between  
308 imported infections was greater than two times the mean serial interval. In (B), the darker,  
309 accented points were simulated data sets where the proportion of cases reporting travel was  
310 within 0.05 of the proportion of imported cases.

311

312 By contrast, when we believed the travel history, the accuracy of reconstructing  
313 transmission networks depended most strongly on the accuracies of the travel history. As the

314 probability of reporting travel increased, the accuracy of classifying imported cases increased,  
315 and the accuracy of classifying locally acquired cases decreased (S11 Fig). Under this inference  
316 setting, our estimate of  $R_c$  depended only on the proportion of cases that reported travel. When  
317 the proportion of cases that reported travel matched the proportion of cases that were imported,  
318 we correctly estimated  $R_c$  (Fig 7B).

319

## 320 **Discussion**

321 Our results show that, in most settings, routinely collected surveillance data offer limited value  
322 for reconstructing individual-level transmission networks of *P. falciparum* malaria and informing  
323 estimates of the reproduction number under control,  $R_c$ . Using simulated data similar to the  
324 Eswatini surveillance data that we analyzed, we observed that our inference algorithm correctly  
325 identified transmission linkages less than 35% of the time. We attribute this inaccuracy primarily  
326 to the inherently limited information content of spatiotemporal data on *P. falciparum*. Its  
327 characteristically long serial interval<sup>22</sup> means that an appreciable number of cases presenting  
328 within a short timeframe are difficult to link to each other based on their timing, even in a  
329 relatively facile test case in which the generative process assumed in the likelihood function  
330 matched that used to simulate the data. The inability to reconstruct transmission networks using  
331 routine surveillance data has been observed for other inference algorithms when applied to  
332 pathogens, such as *Mycobacterium tuberculosis* and *Klebsiella pneumoniae*, with similarly long  
333 serial intervals, providing further evidence that the limitations noted in this study are generally  
334 inherent to the epidemiological data, rather than our method per se<sup>21</sup>.

335 Under most simulated scenarios and assumptions about the accuracy of travel-history  
336 data, we overestimated the number of locally acquired cases, leading to overestimates of  $R_c$ .

337 Crucially, our simulation sweep demonstrated that routinely collected surveillance data was most  
338 informative of individual-level transmission networks and  $R_c$  when local outbreaks were highly  
339 focal in time. Otherwise, while we were able to reconstruct the true transmission network with  
340 modest accuracy, we tended to misclassify truly imported cases as locally acquired, thereby  
341 overestimating  $R_c$ . Taken together, these results suggest limited use of routinely collected  
342 surveillance data for informing fine-scale estimates of *P. falciparum* transmission. At broader  
343 spatial scales, however, routinely collected surveillance data may still have practical value,  
344 because the spatial distribution of cases can reveal epidemiological risk factors relevant for  
345 targeted control interventions<sup>27,28</sup>.

346         Although we were able to reach some general conclusions about our inference algorithm,  
347 our inferences were highly sensitive to which data types we included and which assumptions we  
348 made about the accuracy of travel-history data. Applying our algorithm to surveillance data from  
349 Eswatini, we observed that inferred patterns of transmission depended on which data types we  
350 included. With the inclusion of spatial data, we captured a spatial pattern of transmission  
351 consistent with another analysis from Eswatini<sup>29</sup> with data from a different time period.  
352 Assumptions about the travel history appeared to have a strong influence on the overall  
353 magnitude of transmission that we inferred, due to the direct relationship between  $R_c$  and the  
354 proportion of imported cases<sup>16</sup>. As a result, believing the travel history, and thereby treating it as  
355 perfectly accurate as in previous approaches<sup>6,18–20</sup>, could bias  $R_c$  estimates if there are errors in  
356 travel-history data. A study comparing community travel surveys to mobile-phone data in Kenya  
357 found that travel histories considerably underestimated the volume of travel, suggesting high  
358 rates of false negatives in community travel surveys<sup>30</sup>. Believing the travel history may, then,  
359 underestimate the number of imported cases and overestimate  $R_c$ . Accounting for inaccuracy in

360 travel-history data is therefore important, and studies pairing community travel surveys with  
361 mobile-phone data could be used to inform prior distributions on the likely accuracy of travel-  
362 history data<sup>30,31</sup>.

363 The method that we used only considered a single spatial model to infer transmission  
364 linkages and assumed complete observation of cases, both of which are factors that could have  
365 affected our inferences based on the Eswatini surveillance data. The diffusion model that we  
366 used to represent spatial dispersion of parasites assumed that movement is isotropic in space and  
367 did not consider landscape features, such as heterogeneity in human population densities and  
368 environmental factors that may affect mosquito ecology. A study analyzing self-reported  
369 movement patterns in Mali, Burkina Faso, Zambia, and Tanzania found that gravity and radiation  
370 models of spatial dispersion fit the data well, though the appropriateness of each model depended  
371 on the type of traveler, the travel distance, and the population size of the destination  
372 considered<sup>32</sup>. Although a variety of spatial kernels could have been used in our analysis, we  
373 expect that the conclusions that we reached are robust to the choice of spatial kernel, because the  
374 spatial kernel used in the likelihood matched that used to simulate the data. Regarding the  
375 representation of *P. falciparum* infections in our data set from Eswatini, there are asymptomatic  
376 and mild infections that are unlikely to have been recorded in the surveillance system yet may  
377 comprise a substantial proportion of malaria infections within Eswatini<sup>13</sup>. Accordingly, it is  
378 possible that our assumption of complete observation of cases could have biased  $R_c$  estimates,  
379 likely downward due to the fact that missing cases will tend to make offspring numbers appear  
380 smaller than they actually are<sup>33,34</sup>. Even so, we expect that our conclusions about the sensitivity  
381 of transmission network inferences to the choice of data types and assumptions about travel-  
382 history data are robust to these limitations of our study. This further reinforces our conclusion of

383 the need for caution in attempting to reconstruct person-to-person transmission networks from  
384 routine surveillance data<sup>35</sup>, because incomplete observation of cases would lead to greater  
385 inaccuracies in our transmission network inferences beyond what we noted in our study.

386         Given that some of the limitations of our approach may be inherent to the information  
387 content of these data types in this system, one potential avenue for improving inferences of fine-  
388 scale patterns of *P. falciparum* transmission could involve the integration of additional data  
389 streams. For example, mobile-phone data<sup>36</sup> and high-resolution friction surfaces<sup>37</sup> could more  
390 realistically characterize mobility patterns, whereas travel-history information that details the  
391 dates, duration, and location of each trip that has been used in programmatic contexts<sup>27</sup> could  
392 more accurately identify importation events. Additionally, the inclusion of pathogen genetic data,  
393 which has the potential to provide a more direct signal of parasite movement, could complement  
394 traditional epidemiological data<sup>38</sup>. Diverse genetic markers of *P. falciparum* have been  
395 characterized in near-elimination settings, such as Eswatini<sup>39</sup>, and have been successfully used to  
396 identify imported cases in Bangladesh<sup>40</sup> and Namibia<sup>31</sup>. There is also scope for further  
397 methodological development, such as relaxing our assumption of complete observation of  
398 infections and incorporating an underlying mechanistic model of transmission (as in Lau *et al.*<sup>8</sup>;  
399 Guzzetta *et al.*<sup>41</sup>). Incorporating an underlying mechanistic model would relax our uninformative  
400 prior assumption on all possible transmission networks, ruling out transmission networks that are  
401 epidemiologically implausible and allowing us to account for spatial differences in transmission  
402 potential and the rate of importation due to different epidemiological and demographic factors.  
403 This approach would also permit us to estimate the serial interval distribution and seasonal  
404 variation therein directly from the data rather than borrow estimates from the literature<sup>22,42,43</sup>. To  
405 this end, we envision that leveraging the strengths of our method along with other,



406 complementary methods could strengthen inferences based on routinely collected  
407 epidemiological data and open up new possibilities to make use of even more data types, such as  
408 serological data, prevalence surveys, and pathogen genetic data<sup>38,44,45</sup>.

409

## 410 **Conclusions**

411 We demonstrated the limitations of routinely collected surveillance data for the inference of  
412 individual-level transmission networks of *P. falciparum*. We identified a tendency to  
413 overestimate local transmission using routinely collected surveillance data, especially when  
414 outbreaks overlapped in space and time. Using both real data from Eswatini and simulated data,  
415 we identified strong sensitivities of our inferences to the epidemiological setting, the choice of  
416 data types included, and assumptions about the accuracy of travel-history data. Our results  
417 indicated that using spatial and temporal data and believing travel histories yielded the most  
418 plausible estimates of transmission when applied to the Eswatini surveillance data. However, our  
419 simulation sweep demonstrated that the accuracy of our inferences strongly depended on the  
420 accuracy of the travel-history data when the travel-history data were assumed to be accurate.  
421 These sensitivities to the choice of data types and assumptions about the accuracy of travel-  
422 history data could have important programmatic implications if outputs of transmission network  
423 inferences are operationalized. Although this study was specific to *P. falciparum*, the results of  
424 our analyses indicate that future studies inferring transmission networks of *P. falciparum*, or any  
425 pathogen, should carefully consider the epidemiological setting and the choice of data types and  
426 assumptions that inform the model and should validate them using simulated data.

427 **Methods**

428 **Bayesian framework for estimating transmission linkages**

429 Our goal was to obtain probabilistic estimates of a transmission network  $N$  that defines  
430 transmission linkages among a set of known cases. The transmission network is defined as a  
431 directed, acyclic graph comprised of a set of directed edges represented as  $N = \{N_{i,j}\}$  for all  $i, j$ .  
432 Each  $N_{i,j}$  indicates that case  $i$  is hypothesized to contain parasites that are the most direct  
433 observed ancestors of the parasites contained in case  $j$ . In addition, at least one edge denoted  $N_{u,j}$   
434 must exist in the network, indicating that the parasites contained in case  $j$  have no ancestors  
435 among the parasites contained in any known local case and are instead contained in some  
436 unknown case  $u$  from some source population  $s$ , such that it is denoted  $u_s$ . To illustrate this  
437 terminology, an example transmission network is depicted in Fig 8.

438

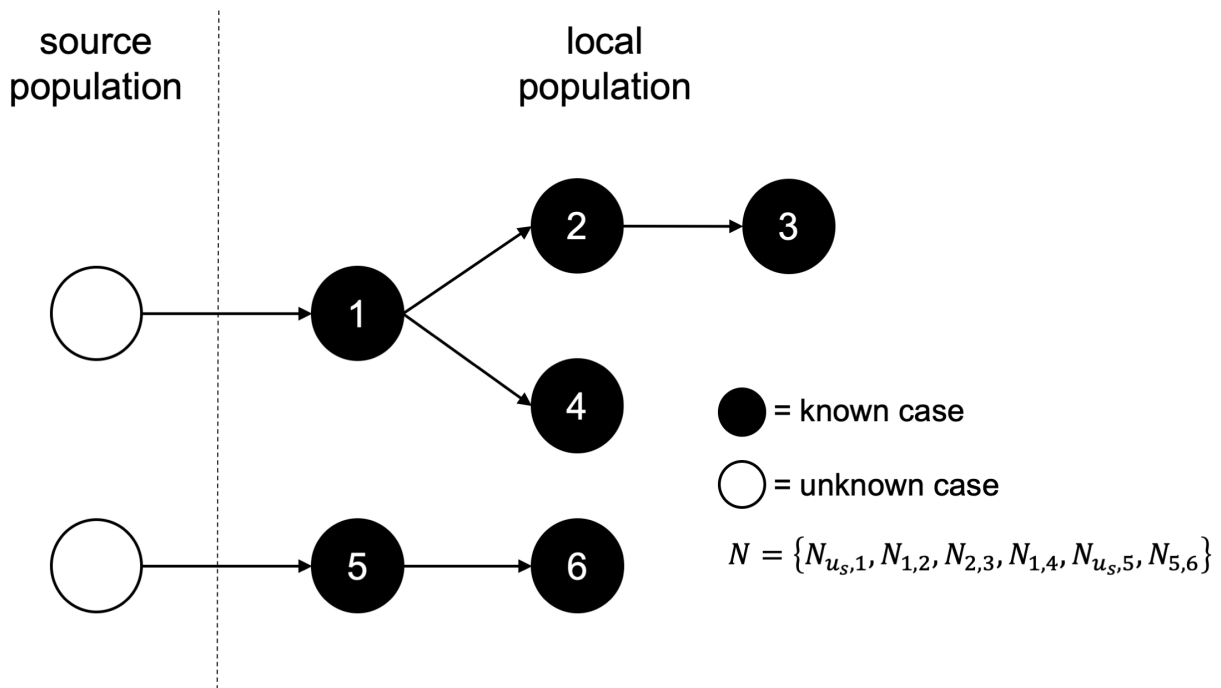

439

440 **Fig 8. Schematic of a hypothetical transmission network.** *A hypothetical transmission network*  
441 *is presented along with the corresponding notation. In the schematic, white circles denote*  
442 *unobserved cases, and black circle denote observed cases. Arrows represent transmission*  
443 *between two cases.*

444

445 To estimate  $N$ , we used spatial, temporal, and travel-history data about all cases, denoted  
446 as  $\vec{X}_s$ ,  $X_t$ , and  $X_h$ , respectively. We did so within a Bayesian statistical framework, meaning that  
447 we sought to estimate the joint posterior probability density,

448

449 
$$\Pr(N, \Theta | X_t, \vec{X}_s, X_h) = \frac{\Pr(X_t, \vec{X}_s, X_h | N, \Theta) \Pr(N, \Theta)}{\Pr(X_t, \vec{X}_s, X_h)}, \quad (1)$$

450

451 of the transmission network defined by  $N$  and the model parameters  $\Theta$  conditional on the data  $\vec{X}_s$ ,  
452  $X_t$ , and  $X_h$ . The first term in the numerator of eq. (1) is the likelihood of  $N$  and  $\Theta$  conditional on  
453 the data. The second term in the numerator is the prior probability of  $N$  and  $\Theta$ . The term in the  
454 denominator is the probability of the data, which is an intractable quantity to calculate directly  
455 given that it would require evaluation of an extremely high-dimensional integral over  $N$  and  $\Theta$ .  
456 To address this, we used a Markov chain Monte Carlo algorithm to draw random samples of  $N$   
457 and  $\Theta$  from the posterior distribution specified in eq. (1).

458 The most critical piece of our inference framework is the likelihood, which we define as a  
459 function of each case  $j$  as

460

461 
$$\mathcal{L}(N, \Theta | X_t, \vec{X}_s, X_h) = \prod_j \Pr(X_{t,j}, \vec{X}_{s,j}, X_{h,j} | N_{.,j}, \Theta). \quad (2)$$

462

463 Below, we define the probability of the data associated with each known case  $j$  as a function of  
464 different assumptions that are possible about how case  $j$  is connected to the rest of the  
465 transmission network.

466

467 **Scenario 1: Local transmission between known cases  $i$  and  $j$**

468 When case  $i$  contains parasites that are immediate ancestors of the parasites contained in case  $j$ ,  
469 we represent its contribution to the likelihood as

470

471 
$$\Pr(X_{t,j}, \vec{X}_{s,j}, X_{h,j} | N_{i,j}, \Theta) = \Pr(X_{t,j} | N_{i,j}, \Theta) \Pr(\vec{X}_{s,j} | X_{t,j}, N_{i,j}, \Theta) \Pr(X_{h,j} | N_{i,j}, \Theta), \quad (3)$$

472

473 which is the product of the probabilities of the temporal, spatial, and travel-history data given the  
474 network and model parameters. This formulation assumes that those data are generated  
475 independently for each individual, with the exception of a dependence of the spatial data on the  
476 temporal data.

477

478 **Probability of the temporal data.** To characterize the time elapsed between two cases resulting  
479 from local transmission, we used a model of the generation and serial intervals for *P. falciparum*  
480 malaria by Huber *et al.*<sup>22</sup>. The generation interval represents the time between infection of a  
481 primary and secondary case, whereas the serial interval represents the time between detection of  
482 those cases. Because the timing of infection per se (i.e., an infectious mosquito inoculating a

483 susceptible human) is typically unknown, we focused on the serial interval as the most apropos  
484 temporal quantity relating cases.

485 In deriving the probability of a given length of the serial interval, Huber *et al.*<sup>22</sup>  
486 convolved a random variable representing variability in the generation interval (*GI*) with a  
487 random variable representing variability in the time between infection with *P. falciparum* and  
488 detection by surveillance – i.e., the infection to detection period (*IDP*). That framework yielded  
489

$$490 \quad \Pr(SI_{i,j} = -a + b + c) = \sum_a \sum_b \sum_c \Pr(IDP_i = a) \Pr(GI_{i,j} = b) \Pr(IDP_j = c), \quad (4)$$

491  
492 as the probability of a serial interval of length  $SI_{i,j}$ . We allowed for different models of the serial  
493 interval depending upon differences in the *GI* and *IDP* for different types of primary and  
494 secondary cases. For instance, we assumed that symptomatic cases present in a clinic some  
495 number of days after infection as informed by empirical data from Zanzibar<sup>22</sup>. For an  
496 asymptomatic infection, we assumed that detection occurred through active surveillance at a  
497 randomly drawn day among all days where its asexual parasitemia exceeds a detection  
498 threshold<sup>22</sup>. The choice of *IDP* for both the primary and secondary case informs the probability  
499 of two cases separated in time by  $SI_{i,j} = X_{t,j} - X_{t,i}$  days.

500  
501 **Probability of the spatial data.** Following Reiner *et al.*<sup>6</sup>, we assumed that a simple two-  
502 dimensional Wiener diffusion process determines the location of secondary cases relative to the  
503 location of their associated primary case. It follows that, for a given diffusion coefficient  $D$  with  
504 units  $km^2 day^{-1}$  and generation interval  $GI_{i,j}$ , the two-dimensional location  $\vec{X}_{s,j}$  of the secondary  
505 case  $j$  is described by a bivariate normal distribution with probability density

506

$$507 \quad f(\vec{X}_{s,j} | \vec{X}_{s,i}, D, GI_{i,j}, N_{i,j}, \Theta) = \frac{1}{2\pi\sigma^2(GI_{i,j})} e^{-\frac{\|\vec{X}_{s,j} - \vec{X}_{s,i}\|}{2\sigma^2(GI_{i,j})}}, \quad (5)$$

508

509 where  $\sigma^2(GI_{i,j}) = DGI_{i,j}$ . This formulation assumes that each spatial dimension is independent,  
510 that the variance scales linearly with the generation interval, and that movement is isotropic  
511 across a continuous landscape.

512 One complication to eq. (5) is that the generation interval  $GI_{i,j}$  is unobserved and,  
513 therefore, cannot take on a fixed value. Instead, we must use data about the serial interval  $SI_{i,j}$  to  
514 inform our generative model for  $\vec{X}_{s,j}$ . To do so, we take advantage of the property of normal  
515 random variables that the sum of two or more random variables is itself a normal random  
516 variable<sup>46</sup>. This property allows us to recast eq. (5) as a function of  $SI$  rather than  $GI$  by  
517 computing the appropriate  $\sigma^2$  as

518

$$519 \quad \sigma^2(SI) = \int \sigma^2(GI) \Pr(GI|SI) dGI, \quad (6)$$

520

521 which is effectively a weighted sum of the spatial variances associated with a given  $GI$   
522 proportional to the probability of each  $GI$  conditional on the observed  $SI$ . This results in

523

$$524 \quad f(\vec{X}_{s,j} | \vec{X}_{s,i}, D, SI_{i,j}, N_{i,j}, \Theta) = \frac{1}{2\pi\sigma^2(SI_{i,j})} e^{-\frac{\|\vec{X}_{s,j} - \vec{X}_{s,i}\|}{2\sigma^2(SI_{i,j})}}, \quad (7)$$

525

526 as the probability density of the spatial data that we assume.

527 In the event that case  $i$  has missing spatial data, we cannot compute the spatial likelihood  
528 of eq. (7). To address this, we define a latent unobserved quantity  $\tilde{X}_{s,i}$ , which represents the  
529 unknown location of case  $i$ . We then integrate over the uncertainty in  $\tilde{X}_{s,i}$ ,

530

$$531 \quad f(\vec{X}_{s,j} | D, SI_{i,j}, N_{i,j}, \Theta) = \int f(\vec{X}_{s,j} | \tilde{X}_{s,i}, D, N_{i,j}, \Theta) f(\tilde{X}_{s,i} | \vec{X}_{s,j}, D) d\tilde{X}_{s,i}, \quad (8)$$

532

533 to compute the probability density of case  $j$  with known spatial location  $\vec{X}_{s,j}$  arising from case  $i$   
534 with unknown spatial location  $\tilde{X}_{s,i}$ . Equation (8) is computed as the product of the probability  
535 density of the location of a known case  $j$  conditional on an unknown location  $\tilde{X}_{s,i}$  and the  
536 probability density of spatial separation  $\vec{X}_{s,j} - \tilde{X}_{s,i}$  conditional on the diffusion coefficient  $D$  for  
537 all  $\tilde{X}_{s,i}$ . Because we assume that movement is isotropic, eq. (8) is a two-dimensional Gaussian  
538 integral, simplifying to

539

$$540 \quad f(\vec{X}_{s,j} | D, SI_{i,j}, N_{i,j}, \Theta) = \frac{1}{4\pi\sigma^2(SI_{i,j})}. \quad (9)$$

541

542 In the event that case  $j$  has missing spatial data and case  $i$  has known spatial data, the latent  
543 unobserved quantity becomes  $\tilde{X}_{s,j}$ . We then integrate over the uncertainty in  $\tilde{X}_{s,j}$  and calculate  
544  $f(\vec{X}_{s,j} | D, SI_{i,j}, N_{i,j}, \Theta)$  using eq. (8-9).

545

546 **Probability of the travel-history data.** Although we assume in this scenario that a person's  
547 infection was locally acquired, our model must still be capable of explaining the travel-history

548 data  $X_{h,j}$ . We define a probability  $\tau_l$  that case  $j$  reported travel (i.e.,  $X_{h,j} = 1$ ) even though they  
549 were not infected during that period of travel, such that

550

$$551 \quad \Pr(X_{h,j} | N_{i,j}, \Theta) = \begin{cases} \tau_l, & X_{h,j} = 1 \\ 1 - \tau_l, & X_{h,j} = 0 \end{cases} \quad (10)$$

552

553 In the event that case  $j$  has missing travel-history data, we cannot compute the travel-  
554 history likelihood of eq. (10). To address this, we defined a latent unobserved quantity  $\tilde{X}_{h,j}$ ,  
555 which represents the unknown travel history of case  $j$ . We then sum across the uncertainty in  
556  $\tilde{X}_{h,j}$ ,

557

$$558 \quad \Pr(X_{h,j} = \text{NA} | N_{i,j}, \Theta) = \Pr(\tilde{X}_{h,j} = 1)\tau_l + (1 - \Pr(\tilde{X}_{h,j} = 1))(1 - \tau_l), \quad (11)$$

559

560 to compute the probability that case  $j$  was locally acquired given an unknown travel history. In  
561 eq. (11),  $\Pr(\tilde{X}_{h,j} = 1)$  was computed as the proportion of cases with a positive travel history  
562 among all cases with known travel-history data.

563 Taken together with the probabilities of the temporal and spatial data described above,  
564 the product of these three probabilities constitutes the entirety of the contribution of a case  $j$   
565 infected by a known local case  $i$  to the overall likelihood of  $N$  and  $\Theta$ .

566

## 567 **Scenario 2: Importation of local case $j$ from source population $s$**

568 In the event of  $N_{u_s,j}$ , we represent the contribution of such a case to the overall likelihood of  $N$   
569 and  $\Theta$  as the product of the probabilities of its temporal, spatial, and travel-history data under



570 similar assumptions as in Scenario 1. The key difference in this scenario is that there is no  
571 information about the unknown source case that gave rise to case  $j$ .

572  
573 **Probability of the temporal data.** Because the person containing parasites that are the direct  
574 ancestors of those in case  $j$  is unobserved and does not have an  $X_{t,i}$ , we are unable to compute the  
575 probability of the temporal data as described in Scenario 1. It is important though to obtain a  
576 probability comparable to that from Scenario 1 as a reference point for determining whether it is  
577 more likely that a given case arose from some other known local case or from an unknown case  
578  $u_s$  from source population  $s$ . To do so, we consider the variable  $\tilde{X}_{t,u_s}$ , which is a latent variable  
579 describing the timing of when  $u_s$  would have been detected, had it been detected.

580 Because  $u_s$  is not observed, we considered it to be asymptomatic and untreated. We then  
581 calculated the probability of the timing of a known case  $j$  arising from an unknown case  $u_s$  as

582  
583 
$$\Pr(X_{t,j} | N_{u_s,j}, \Theta) = \int \Pr(X_{t,j} | \tilde{X}_{t,u_s}, N_{u_s,j}, \Theta) \Pr(\text{SI} = X_{t,j} - \tilde{X}_{t,u_s}) d\tilde{X}_{t,u_s}, \quad (12)$$

584  
585 by integrating over uncertainty in  $\tilde{X}_{t,u_s}$ . We represented this as the product of the probability of  
586 the timing of a known case  $j$  conditional on an unknown time of detection  $\tilde{X}_{t,u_s}$  and the  
587 probability of the serial interval  $X_{t,j} - \tilde{X}_{t,u_s}$  for all  $\tilde{X}_{t,u_s}$ . In equation (12), we did not distinguish  
588 between symptomatic and asymptomatic cases  $j$  because the calculation is identical; only the  
589 serial interval distributions differ.

590

591 **Probability of the spatial data.** Without an  $\tilde{X}_{t,u_s}$  for the unobserved case  $u_s$ , we lacked  
592 information on the serial interval between it and case  $j$ . Consequently, we were unable to use the  
593 probability from eq. (7) in that particular form. Instead, we computed the spatial variance as a  
594 function of the diffusion coefficient alone, yielding

$$596 \quad \sigma^2(D) = \int D GI \Pr(GI) dGI. \quad (13)$$

597  
598 Equation (13) integrates across all possible generation intervals and simplifies to  $D\mathbb{E}[GI]$ , the  
599 product of the diffusion coefficient and the expectation of the generation interval.

600 We applied this spatial variance to the unobserved latent variable  $\tilde{X}_{s,u_s}$ , which represents  
601 the unknown location of the unobserved case  $u_s$ . We integrated over uncertainty in  $\tilde{X}_{s,u_s}$  to  
602 compute the probability density,

$$604 \quad f(X_{s,j}|D, N_{u_s,j}, \Theta) = \int f(X_{s,j}|\tilde{X}_{s,u_s}, D, N_{u_s,j}, \Theta) f(\tilde{X}_{s,u_s}|X_{s,j}, D) d\tilde{X}_{s,u_s}, \quad (14)$$

605  
606 of the location of a known case  $j$  arising from an unknown source case  $u_s$  with unknown location  
607  $\tilde{X}_{s,u_s}$ . This is represented as the product of the probability density of the location of a known case  
608  $j$  conditional on an unknown location  $\tilde{X}_{s,u_s}$  and the probability density of spatial separation  
609  $X_{s,j} - \tilde{X}_{s,u_s}$  conditional on the diffusion coefficient  $D$  for all  $\tilde{X}_{s,u_s}$ . As in eq. (9), we treated eq.  
610 (14) as an evaluation of the Gaussian integral, evaluating to

611

612 
$$f(X_{s,j} | D, N_{u_s,j}, \Theta) = \frac{1}{4\pi D \mathbb{E}[GI]}. \quad (15)$$

613  
614 In eq. (15),  $D$  is the diffusion coefficient and  $\mathbb{E}[GI]$  is the expectation of the generation interval.

615  
616 **Probability of the travel-history data.** We considered the travel history  $X_{h,j}$  to be a binary  
617 variable with a value of 1 indicating reported travel to an area with known or assumed malaria  
618 transmission within a timeframe consistent with the person having become infected there. After  
619 defining the probability  $\tau_s$  that  $X_{h,j} = 1$  conditional on  $N_{u_s,j}$ , it follows that

620  
621 
$$\Pr(X_{h,j} | N_{u_s,j}, \Theta) = \begin{cases} \tau_s, & X_{h,j} = 1 \\ 1 - \tau_s, & X_{h,j} = 0 \end{cases} \quad (16)$$

622  
623 which constitutes the contribution of the travel history of such a case to the overall likelihood of  
624  $N$  and  $\Theta$ . If the travel history of case  $j$  is unknown, an analogous calculation to eq. (11) is made  
625 using  $\tau_s$ .

626  
627 **Bayesian inference**

628 **Markov Chain Monte Carlo Algorithm.** To avoid evaluating the high-dimensional integral  
629 over  $N$  and  $\Theta$ , we drew samples of  $N$  and  $\Theta$  from their posterior distribution defined by eq. (1)  
630 using a Metropolis-Hastings Markov chain Monte Carlo (MCMC) method<sup>47,48</sup>. To begin the  
631 chain,  $N$  and  $\Theta$  were initialized to  $N^{(1)}$  and  $\Theta^{(1)}$ , and each subsequent step  $i$  in the chain was

632 denoted  $N^{(i)}$  and  $\Theta^{(i)}$ . At each step, states  $N'$  and  $\Theta'$  were proposed with  $\Pr\left((N^{(i)}, \Theta^{(i)}) \rightarrow\right.$   
633  $(N', \Theta')\left.)\right)$ . Proposed states were accepted with probability

634

$$635 \quad \alpha_{\text{update}} = \min \left[ 1, \frac{\pi(N', \Theta') \Pr\left((N', \Theta') \rightarrow (N^{(i)}, \Theta^{(i)})\right)}{\pi(N^{(i)}, \Theta^{(i)}) \Pr\left((N^{(i)}, \Theta^{(i)}) \rightarrow (N', \Theta')\right)} \right], \quad (17)$$

636

637 where  $\pi(N, \Theta)$  is the product of the likelihood  $\Pr(\vec{X}_s, X_t, X_h | N, \Theta)$  of  $N$  and  $\Theta$  conditional on the  
638 data and the assumed prior probability  $\Pr(N, \Theta)$  of  $N$  and  $\Theta$ . After a random draw  $R$  from a  
639 uniform distribution, the chain was updated according to

640

$$641 \quad N^{(i+1)}, \Theta^{(i+1)} = \begin{cases} N', \Theta', & R \leq \alpha \\ N^{(i)}, \Theta^{(i)}, & R > \alpha \end{cases} \quad (18)$$

642

643 To reduce the probability of the chain becoming stuck at a local maximum, we employed  
644 Metropolis-coupled Markov chain Monte Carlo (MC<sup>3</sup>)<sup>49</sup>. Implementing MC<sup>3</sup> involved running  
645 multiple chains in parallel, with  $\pi_c(N, \Theta)$  in chain  $c$  raised to the power  $\beta_c$  according to

646

$$647 \quad \beta_c = 1 + \lambda(c - 1), \quad (19)$$

648

649 where  $\lambda > 0$  is a temperature increment parameter that governs the degree to which each chain is  
650 “heated.” As a result of setting  $\beta_1 = 1$ ,  $\pi_1(N, \Theta)$  is directly proportional to the joint posterior  
651 distribution and is referred to as the master or “cold” chain. This algorithm effectively flattens  
652 the likelihood in the heated chains by setting  $\beta_c > 1$ , allowing them to explore the parameter

653 space more freely and to encounter alternative high-density regions more readily than the cold  
654 chain would alone. At a pre-defined frequency, two randomly selected chains  $i$  and  $j$  were  
655 allowed to swap parameter sets according to a swap probability

656

$$657 \quad \alpha_{\text{swap}} = \min \left[ 1, \frac{\pi(N^{(j)}, \Theta^{(j)})^{\beta_i} \pi(N^{(i)}, \Theta^{(i)})^{\beta_j}}{\pi(N^{(i)}, \Theta^{(i)})^{\beta_i} \pi(N^{(j)}, \Theta^{(j)})^{\beta_j}} \right], \quad (20)$$

658

659 where  $\pi(N, \Theta)$  is the same as it was in eq. (17). A swap into the master chain only occurred if it  
660 was from one of the two randomly selected chains and  $R \leq \alpha_{\text{swap}}$ . We recorded a total of 100  
661 million samples from the posterior distribution, discarding the first 50 million samples as burn-in  
662 and thinning the chain every 10,000 samples between each recorded sample.

663

664 **Proposals.** Proposals made by the MC<sup>3</sup> algorithm involved changes to the parameters (i.e.,  $D$ ,  $\tau_s$ ,  
665 and  $\tau_l$ ) and changes to the transmission network topology. Each proposal occurred with a fixed  
666 probability, where the sum of these proposal probabilities was equal to one.

667 Proposals to change parameters involved updating  $D$ ,  $\tau_s$ , or  $\tau_l$ . To update the value of  $D$ , a  
668 new value was drawn from a normal distribution with mean set to the current value of the  
669 parameter and variance set to 2.5. Values of  $D$  proposed must be strictly nonnegative, so we  
670 rejected any proposed  $D$  that was less than zero and assigned  $\alpha_{\text{update}} = 0$ . Similarly, new values  
671 of  $\tau_s$  and  $\tau_l$  were chosen according to normal distributions with means set to their current  
672 parameter value and variance set to 0.25. Because  $\tau_s$  and  $\tau_l$  are probabilities, we rejected any  
673 proposed value that fell outside the range  $[0,1]$  and assigned  $\alpha_{\text{update}} = 0$ .

674 Changes proposed to the network topology involved the addition or removal of an  
675 ancestor from a randomly selected node. We assigned a uniform probability of proposing case  $a$   
676 as an ancestor to a randomly selected case  $i$ , such that proposals to the network topology are  
677 uninformed by spatial and temporal data. Furthermore, we defined the proposal probability of  
678 removing case  $a$  as an ancestor to a randomly selected case  $i$  as

679

$$680 \Pr(\text{remove } a) = \bar{A}_i^{-1}, \quad (21)$$

681

682 where  $\bar{A}_i$  represents the size of set  $A_i$  of all ancestors to case  $i$ . Proposed changes to the network  
683 are then accepted according to eq. (17).

684

685 **Prior assumptions.** We placed strong priors on  $\tau_s$  and  $\tau_l$ , because we assumed that travel  
686 histories were mostly, but not completely, accurate. We used a beta-distributed prior on  $\tau_s$ , with  
687 parameters  $\alpha_{\tau_s} = 12$  and  $\beta_{\tau_s} = 3$ , which resulted in a mean of 0.8 and a variance of 0.01 for this  
688 prior distribution. We also used a beta distributed prior on  $\tau_l$ , with parameters  $\alpha_{\tau_l} = 3$  and  $\beta_{\tau_l} =$   
689 12, which resulted in a mean of 0.2 and a variance of 0.01. We assumed a uniform prior on  $D$   
690 over the interval  $[10^{-3}, \infty)$  and an even prior across all possible network configurations,  
691 meaning that those prior probabilities canceled out in eqs. (17) and (20).

692

693 **Assessing convergence.** For  $D$ ,  $\tau_s$ , and  $\tau_l$ , we assessed convergence using the Gelman-Rubin  
694 statistic<sup>50</sup>, with values below 1.1 indicating convergence. For the transmission network  $N$ , we  
695 assessed convergence by calculating correlation coefficients of case-level probabilities across  
696 five chains from independent realizations of the MC<sup>3</sup> algorithm, for a total of 10 pairwise

697 comparisons across the five chains. The two case-level probabilities that we considered were the  
698 posterior probability that each case was infected by an unknown case  $u_s$  from a source population  
699 and the posterior probability that each case  $j$  was infected by each other case  $i$ . Higher values of  
700 these correlation coefficients provided stronger support for convergence.

701

## 702 **Ethical Considerations**

703 Ethical approval was obtained from the Eswatini Ministry of Health, the University of  
704 California, San Francisco, and the University of Notre Dame (IRB 19-06-5408). All data were  
705 analyzed anonymously.

706

## 707 **Data Availability**

708 The code and simulated data to reproduce the analyses can be found  
709 at [https://github.com/johnhhuber/SpaceTime\\_Networks](https://github.com/johnhhuber/SpaceTime_Networks). The data collected from Eswatini  
710 contains sensitive household locations and are unable to be shared due to institutional review  
711 board restrictions.

712

## 713 **Competing Interests**

714 The authors have no competing interests to declare.

715

## 716 **Acknowledgments**

717 The authors thank the National Malaria Elimination Programme as well as Nontokozo Mngadi  
718 and Deepa Pindolia from the Clinton Health Access Initiative for their support in the collection  
719 of the surveillance data used in this study. We also thank Brooke Whittemore for her support in

720 data management. JHH acknowledges support from a National Science Foundation Graduate  
721 Research Fellowship and a Richard and Peggy Notebaert Premier Fellowship. BG and TAP  
722 received support from a grant from the Bill and Melinda Gates Foundation (OPP 1132226 to  
723 BG). MSH received support from NIAID (AI101012). The funders had no role in study design,  
724 analysis, decision to publish, or preparation of the manuscript.

725

## 726 **Author Contributions**

727 J.H.H, T.A.P, and B.G. conceived of the study. M.S.H., N.D., S.V., N.N., N.N, and B.G. curated  
728 the data. J.H.H., M.S.H., M.M., A.L., B.G., and T.A.P performed the formal analysis. Funding  
729 was acquired by B.G. and M.S.H. Investigation was by J.H.H, B.G., and T.A.P. Methodology  
730 was developed by J.H.H., M.M., A.L., R.N, B.G, and T.A.P. Project administration was by  
731 J.H.H. and T.A.P. J.H.H worked with the software. T.A.P and B.G. supervised the project.  
732 J.H.H, B.G., and T.A.P wrote the original draft of the manuscript. All authors contributed to the  
733 final version of the manuscript.

734

## 735 **Materials and Correspondence**

736 Please direct all requests to [jhuber3@nd.edu](mailto:jhuber3@nd.edu) (JHH) and [taperkins@nd.edu](mailto:taperkins@nd.edu) (TAP).

737

## 738 **References**

- 739 1. Wallinga, J. & Teunis, P. Different epidemic curves for severe acute respiratory syndrome  
740 reveal similar impacts of control measures. *Am. J. Epidemiol.* **160**, 509–516 (2004).
- 741 2. White, L. F., Archer, B. & Pagano, M. Estimating the reproductive number in the presence of  
742 spatial heterogeneity of transmission patterns. *Int J Health Geogr* **12**, 35 (2013).



- 743 3. Métras, R. *et al.* Transmission Potential of Rift Valley Fever Virus over the Course of the  
744 2010 Epidemic in South Africa. *Emerg. Infect. Dis.* **19**, 916–924 (2013).
- 745 4. Backer, J. A. & Wallinga, J. Spatiotemporal Analysis of the 2014 Ebola Epidemic in West  
746 Africa. *PLoS Comput Biol* **12**, e1005210 (2016).
- 747 5. Salje, H., Cummings, D. A. T. & Lessler, J. Estimating infectious disease transmission  
748 distances using the overall distribution of cases. *Epidemics* **17**, 10–18 (2016).
- 749 6. Reiner, R. C. *et al.* Mapping residual transmission for malaria elimination. *eLife* **4**, (2015).
- 750 7. Lau, M. S. Y. *et al.* Spatial and temporal dynamics of superspreading events in the 2014-  
751 2015 West Africa Ebola epidemic. *Proc. Natl. Acad. Sci. U.S.A.* **114**, 2337–2342 (2017).
- 752 8. Lau, M. S. Y. *et al.* A mechanistic spatio-temporal framework for modelling individual-to-  
753 individual transmission—With an application to the 2014-2015 West Africa Ebola outbreak.  
754 *PLoS Comput Biol* **13**, e1005798 (2017).
- 755 9. Jombart, T. *et al.* Bayesian Reconstruction of Disease Outbreaks by Combining  
756 Epidemiologic and Genomic Data. *PLoS Comput Biol* **10**, e1003457 (2014).
- 757 10. Didelot, X., Gardy, J. & Colijn, C. Bayesian Inference of Infectious Disease Transmission  
758 from Whole-Genome Sequence Data. *Molecular Biology and Evolution* **31**, 1869–1879  
759 (2014).
- 760 11. Mollentze, N. *et al.* A Bayesian approach for inferring the dynamics of partially observed  
761 endemic infectious diseases from space-time-genetic data. *Proc. Biol. Sci.* **281**, 20133251  
762 (2014).
- 763 12. Ypma, R. J. F., van Ballegooijen, W. M. & Wallinga, J. Relating Phylogenetic Trees to  
764 Transmission Trees of Infectious Disease Outbreaks. *Genetics* **195**, 1055–1062 (2013).

- 765 13. Sturrock, H. J. W. *et al.* Targeting Asymptomatic Malaria Infections: Active Surveillance in  
766 Control and Elimination. *PLoS Med* **10**, e1001467 (2013).
- 767 14. Bousema, T. *et al.* Hitting Hotspots: Spatial Targeting of Malaria for Control and  
768 Elimination. *PLoS Med* **9**, e1001165 (2012).
- 769 15. Bejon, P. *et al.* A micro-epidemiological analysis of febrile malaria in Coastal Kenya  
770 showing hotspots within hotspots. *eLife* **3**, e02130 (2014).
- 771 16. Cohen, J. M., Moonen, B., Snow, R. W. & Smith, D. L. How absolute is zero? An evaluation  
772 of historical and current definitions of malaria elimination. *Malar J* **9**, 213 (2010).
- 773 17. Cohen, J. M. *et al.* Mapping multiple components of malaria risk for improved targeting of  
774 elimination interventions. *Malar J* **16**, 459 (2017).
- 775 18. Churcher, T. S. *et al.* Measuring the path toward malaria elimination. *Science* **344**, 1230–  
776 1232 (2014).
- 777 19. Routledge, I. *et al.* Estimating spatiotemporally varying malaria reproduction numbers in a  
778 near elimination setting. *Nat Commun* **9**, 2476 (2018).
- 779 20. Routledge, I. *et al.* Tracking progress towards malaria elimination in China: Individual-level  
780 estimates of transmission and its spatiotemporal variation using a diffusion network  
781 approach. *PLoS Comput Biol* **16**, e1007707 (2020).
- 782 21. Campbell, F., Strang, C., Ferguson, N., Cori, A. & Jombart, T. When are pathogen genome  
783 sequences informative of transmission events? *PLoS Pathog* **14**, e1006885 (2018).
- 784 22. Huber, J. H., Johnston, G. L., Greenhouse, B., Smith, D. L. & Perkins, T. A. Quantitative,  
785 model-based estimates of variability in the generation and serial intervals of *Plasmodium*  
786 *falciparum* malaria. *Malaria Journal* **15**, (2016).

- 787 23. Marshall, J. M., Bennett, A., Kiware, S. S. & Sturrock, H. J. W. The Hitchhiking Parasite:  
788 Why Human Movement Matters to Malaria Transmission and What We Can Do About It.  
789 *Trends in Parasitology* **32**, 752–755 (2016).
- 790 24. Campbell, F., Cori, A., Ferguson, N. & Jombart, T. Bayesian inference of transmission  
791 chains using timing of symptoms, pathogen genomes and contact data. *PLoS Comput Biol*  
792 **15**, e1006930 (2019).
- 793 25. Wood, S. N. *Generalized additive models: an introduction with R*. (Chapman & Hall/CRC,  
794 2006).
- 795 26. R Development Core Team. *R: A Language and Environment for Statistical Computing*. (R  
796 Foundation for Statistical Computing, 2017).
- 797 27. Cohen, J. M. *et al.* Rapid case-based mapping of seasonal malaria transmission risk for  
798 strategic elimination planning in Swaziland. *Malar J* **12**, 61 (2013).
- 799 28. Hsiang, M. S. *et al.* Effectiveness of reactive focal mass drug administration and reactive  
800 focal vector control to reduce malaria transmission in the low malaria-endemic setting of  
801 Namibia: a cluster-randomised controlled, open-label, two-by-two factorial design trial. *The*  
802 *Lancet* **395**, 1361–1373 (2020).
- 803 29. Sturrock, H. J. *et al.* Fine-scale malaria risk mapping from routine aggregated case data.  
804 *Malar J* **13**, 421 (2014).
- 805 30. Wesolowski, A. *et al.* Quantifying travel behavior for infectious disease research: a  
806 comparison of data from surveys and mobile phones. *Sci Rep* **4**, 5678 (2015).
- 807 31. Tessema, S. *et al.* Using parasite genetic and human mobility data to infer local and cross-  
808 border malaria connectivity in Southern Africa. *eLife* **8**, e43510 (2019).

- 809 32. Marshall, J. M. *et al.* Mathematical models of human mobility of relevance to malaria  
810 transmission in Africa. *Sci Rep* **8**, 7713 (2018).
- 811 33. Blumberg, S. & Lloyd-Smith, J. O. Inference of R0 and Transmission Heterogeneity from  
812 the Size Distribution of Stuttering Chains. *PLoS Comput Biol* **9**, e1002993 (2013).
- 813 34. Blumberg, S. & Lloyd-Smith, J. O. Comparing methods for estimating R0 from the size  
814 distribution of subcritical transmission chains. *Epidemics* **5**, 131–145 (2013).
- 815 35. Robert, A., Kucharski, A. J., Gastañaduy, P. A., Paul, P. & Funk, S. Probabilistic  
816 reconstruction of measles transmission clusters from routinely collected surveillance data. *J.*  
817 *R. Soc. Interface.* **17**, 20200084 (2020).
- 818 36. Wesolowski, A. *et al.* Quantifying the Impact of Human Mobility on Malaria. *Science* **338**,  
819 267–270 (2012).
- 820 37. Weiss, D. J. *et al.* A global map of travel time to cities to assess inequalities in accessibility  
821 in 2015. *Nature* **553**, 333–336 (2018).
- 822 38. Wesolowski, A. *et al.* Mapping malaria by combining parasite genomic and epidemiologic  
823 data. *BMC Med* **16**, 190 (2018).
- 824 39. Roh, M. E. *et al.* High Genetic Diversity of Plasmodium falciparum in the Low-  
825 Transmission Setting of the Kingdom of Eswatini. *The Journal of Infectious Diseases* **220**,  
826 1346–1354 (2019).
- 827 40. Chang, H.-H. *et al.* Mapping imported malaria in Bangladesh using parasite genetic and  
828 human mobility data. *eLife* **8**, e43481 (2019).
- 829 41. Guzzetta, G., Marques-Toledo, C. A., Rosà, R., Teixeira, M. & Merler, S. Quantifying the  
830 spatial spread of dengue in a non-endemic Brazilian metropolis via transmission chain  
831 reconstruction. *Nature Communications* **9**, (2018).

- 832 42. Salje, H. *et al.* How social structures, space, and behaviors shape the spread of infectious  
833 diseases using chikungunya as a case study. *Proc Natl Acad Sci USA* **113**, 13420–13425  
834 (2016).
- 835 43. Guzzetta, G. *et al.* Spatial modes for transmission of chikungunya virus during a large  
836 chikungunya outbreak in Italy: a modeling analysis. *BMC Med* **18**, 226 (2020).
- 837 44. Weiss, D. J. *et al.* Mapping the global prevalence, incidence, and mortality of Plasmodium  
838 falciparum, 2000–17: a spatial and temporal modelling study. *The Lancet* **394**, 322–331  
839 (2019).
- 840 45. Greenhouse, B., Smith, D. L., Rodríguez-Barraquer, I., Mueller, I. & Drakeley, C. J. Taking  
841 Sharper Pictures of Malaria with CAMERAs: Combined Antibodies to Measure Exposure  
842 Recency Assays. *The American Journal of Tropical Medicine and Hygiene* **99**, 1120–1127  
843 (2018).
- 844 46. Lemons, D. S. & Langevin, P. *An introduction to stochastic processes in physics: containing*  
845 *‘On the theory of Brownian motion’ by Paul Langevin, translated by Anthony Gythiel.* (Johns  
846 Hopkins University Press, 2002).
- 847 47. Metropolis, N., Rosenbluth, A. W., Rosenbluth, M. N., Teller, A. H. & Teller, E. Equation of  
848 State Calculations by Fast Computing Machines. *The Journal of Chemical Physics* **21**, 1087–  
849 1092 (1953).
- 850 48. Hastings, W. K. Monte Carlo Sampling Methods Using Markov Chains and Their  
851 Applications. *Biometrika* **57**, 97 (1970).
- 852 49. Altekar, G., Dwarkadas, S., Huelsenbeck, J. P. & Ronquist, F. Parallel Metropolis coupled  
853 Markov chain Monte Carlo for Bayesian phylogenetic inference. *Bioinformatics* **20**, 407–415  
854 (2004).

855 50. Gelman, A. & Rubin, D. B. Inference from Iterative Simulation Using Multiple Sequences.

856 *Statistical Science* 7, 457–472 (1992).

857
