# Supplementary material for: Inferring person-to-person networks of Plasmodium falciparum transmission: is routine surveillance data up to the task?
Source: bioRxiv or medRxiv preprint supplement (doi:10.1101/2020.08.24.20180844), 2021-02-18
Supplement: Supplementary file [file 2020.08.24.20180844-2.pdf]

# 1 Results

## 2 Analytical Solution for the Posterior Distribution of $\tau_s$ and $\tau_l$

3 We specified a Bernoulli likelihood and a beta-distributed prior on  $\tau_s$  and  $\tau_l$ . Therefore, the  
4 posterior distributions of  $\tau_s$  and  $\tau_l$  satisfy a conjugate-prior relationship and can be solved  
5 analytically as beta distributions.

6 The prior distribution for  $\tau_s$  is a beta distribution with hyperparameters  $\alpha_s = 12$  and  $\beta_s =$   
7 3, and the prior distribution for  $\tau_l$  is a beta distribution with hyperparameters  $\alpha_l = 3$  and  $\beta_l = 12$ .  
8 Following the conjugate-prior relationship, the posterior distribution for  $\tau_s$  is calculated as a beta  
9 distribution with hyperparameters,

10

$$11 \quad \hat{\alpha}_s = \alpha_s + \sum_{n_{founders}} \mathbb{I}(report\ travel) \quad (S1)$$

12

$$13 \quad \hat{\beta}_s = \beta_s + \left( n_{founders} - \sum_{n_{founders}} \mathbb{I}(report\ travel) \right). \quad (S2)$$

14

15 The summation in eq. (S1) is the number of cases that reported travel and are inferred by the  
16 algorithm to be imported cases. Similarly, the second term in eq. (S2) is the number of cases  
17 inferred by the algorithm to be imported cases that did not report travel. The posterior  
18 distribution for  $\tau_l$  is similarly described by a beta distribution with hyperparameters,

19

$$20 \quad \hat{\alpha}_l = \alpha_l + \sum_{n_{local}} \mathbb{I}(report\ travel) \quad (S3)$$

21

$$\hat{\beta}_l = \beta_l + \left( n_{local} - \sum_{n_{local}} \mathbb{I}(report\ travel) \right). \quad (S4)$$

23

24 In eq. (S3), the summation is the number of cases that reported travel and were inferred by the  
25 algorithm to be locally acquired. Similarly, the second term in eq. (S4) is the number of cases  
26 inferred by the algorithm to be locally acquired that did not report travel.

27

28 We then compared the prior distributions, the posterior distributions obtained from the  
29 MC3 sampling algorithm, and the posterior distribution obtained using the analytical solutions in  
30 eqs. (S1-S4) for  $\tau_s$  and  $\tau_l$  inferred from the Eswatini surveillance data. Because each case had a  
31 posterior probability of being imported or locally acquired but eqs. (S1-S4) required a binary  
32 classification, we classified a case as imported if the posterior probability of being imported  
33 exceeded 0.25. This threshold was arbitrarily defined, but the purpose of this exercise is purely  
34 illustrative.

35

36 Under both inference settings in which the accuracy of the travel histories was inferred,  
37 we observed good agreement between the analytical and numerical posterior distributions for  $\tau_s$   
38 and  $\tau_l$ . Whether or not the posterior distribution deviated from the prior distribution depended  
39 upon the number of cases that were classified as imported or locally acquired. When there are  
40 more cases classified as imported, the strength of the data predominated in eqs. (S1-S2), and the  
41 posterior distribution of  $\tau_s$  deviated from the prior distribution. By contrast, when most cases are  
42 locally acquired, the posterior distribution of  $\tau_s$  resembled the prior distribution. This is  
43 consistent with the posterior distributions that we observed when we used spatial and temporal  
44 data and estimated the accuracy of the travel history versus when we used temporal data and

43 estimated the accuracy of the travel history. Using the former, we estimated 5.2% of the cases as  
44 imported, which was sufficient to shift the posterior distribution of  $\tau_s$  away from the prior  
45 distribution (S5 Fig). Using the latter, we only estimated 0.13% of cases as imported. This small  
46 number of imported cases implied that the posterior distribution of  $\tau_s$  resembled the prior  
47 distribution (S6 Fig).

48

49 **S5 Fig. Comparison of the prior and posteriors of  $\tau_s$  and  $\tau_l$  from the Eswatini surveillance**  
50 **data using spatial and temporal data and estimating the accuracy of the travel history.** The  
51 prior (gray shape), the analytical posterior distribution (black line), and the numerical posterior  
52 distribution from MC3 (green histogram) are plotted for  $\tau_s$  and  $\tau_l$ .

53

54 **S6 Fig. Comparison of the prior and posteriors of  $\tau_s$  and  $\tau_l$  from the Eswatini surveillance**  
55 **data using temporal data and estimating the accuracy of the travel history.** The prior (gray  
56 shape), the analytical posterior distribution (black line), and the numerical posterior distribution  
57 from MC3 (pink histogram) are plotted for  $\tau_s$  and  $\tau_l$ .

58

59 The derivation of the analytical solution of  $\tau_s$  explains our inability to correctly estimate this  
60 parameter from simulated data (Fig 5B). Using the spatial and temporal data and estimating the  
61 accuracy of the travel history, the true value of  $\tau_s$  was 0.61, and 5.2% of all cases in the  
62 simulated data set were imported. However, applying the MC3 algorithm to this simulated data  
63 set, we inferred only ~1% of all cases to be imported. Consequently, we do not estimate a  
64 sufficient number of imported cases to shift the posterior distribution of  $\tau_s$  away from the prior  
65 distribution and correctly estimate this parameter (S7 Fig).

66

67 **S7 Fig. Comparison of the prior and posteriors of  $\tau_s$  from simulated data using spatial and**

68 **temporal data and estimating the accuracy of the travel history.** The prior (gray shape), the

69 analytical posterior distribution (black line), and the numerical posterior distribution from MC3

70 (green histogram) are plotted for  $\tau_s$ .
