# Supplementary material for: Inferring person-to-person networks of Plasmodium falciparum transmission: is routine surveillance data up to the task?
Source: bioRxiv or medRxiv preprint supplement (doi:10.1101/2020.08.24.20180844), 2021-02-18
Supplement: Supplementary file [file media-1.pdf]

1  
2  
3  
4  
5  
6  
7  
8  
9

Supplementary Materials for  
**Inferring person-to-person networks of *Plasmodium falciparum* transmission:  
is routine surveillance data up to the task?**

John H. Huber<sup>\*</sup>, Michelle S. Hsiang, Nomcebo Dlamini, Maxwell Murphy, Sibonakaliso  
Vilakati, Nomcebo Nhlabathi, Anita Lerch, Rasmus Nielsen, Nyasatu Ntshalintshali,  
Bryan Greenhouse, T. Alex Perkins<sup>\*</sup>

Email: [jhuber3@nd.edu](mailto:jhuber3@nd.edu) (JHH); [taperkins@nd.edu](mailto:taperkins@nd.edu) (TAP)

10 **TABLE OF CONTENTS**

11 **1. METHODS ..... 3**

12 1.1. DATA ..... 3

13 1.2. ANALYSIS ..... 6

14 1.2.1. *Validation using a simple test case* ..... 6

15 1.2.2. *Application to Eswatini surveillance data* ..... 8

16 1.2.3. *Validation of inferences from Eswatini* ..... 9

17 1.2.4. *Simulation Sweep*..... 11

18 **2. RESULTS ..... 12**

19 2.1. VALIDATION USING A SIMPLE TEST CASE ..... 12

20 2.2. LIKELIHOOD PROFILE OF THE DIFFUSION COEFFICIENT ..... 15

21 2.3. CONVERGENCE OF POSTERIOR TRANSMISSION NETWORK INFERENCE ..... 16

22 2.4. ANALYTICAL SOLUTION FOR THE POSTERIOR DISTRIBUTION OF  $\tau_s$  AND  $\tau_L$ ..... 20

23 2.5. SIMULATION SWEEP ..... 25

24 2.6. UNCERTAINTY IN HIGHER-ORDER SUMMARIES OF THE NETWORK..... 31

25 **3. REFERENCES ..... 34**

26

27

## 28 **1. Methods**

### 29 **1.1. Data**

30 Eswatini is a low-transmission setting in sub-Saharan Africa believed to have high rates of  
31 malaria importation<sup>1</sup>. A rigorous surveillance system was established to support the country in  
32 making decisions about how to target and tailor interventions for malaria elimination.

33       Between January 1<sup>st</sup>, 2013 and December 31<sup>st</sup>, 2016, 775 cases were identified through  
34 active case investigation (ACI, following up on symptomatic malaria cases presenting to health  
35 facilities) and reactive case detection (ACD, actively screening neighbors of symptomatic  
36 malaria cases) by the National Malaria Elimination Programme (Fig S1A, S1B). ACI were  
37 identified using rapid diagnostic test (RDT) in patients presenting with fever to health facilities.  
38 Infection status was confirmed with loop-mediated isothermal amplification (LAMP) using a  
39 dried blood spot (DBS) which per national policy, was to be collected in all RDT-positives using  
40 a second finger prick at the time of presentation and before antimalarial treatment. When DBS  
41 was not collected at presentation, a team aimed to visit the patient within 48 hours and collected  
42 a DBS at that time. In the analysis, we included all ACIs with a positive LAMP result as well as  
43 ACIs with a negative LAMP result if the DBS was collected following treatment, due to the  
44 rapid decline of parasitemia after treatment. ACD refers to largely asymptomatic RDT and  
45 LAMP-positive individuals identified through reactive case detection (malaria testing using RDT  
46 for household members and neighbors of passive detected index cases). We included ACDs with  
47 a positive LAMP result as well as ACDs with a positive RDT result and no LAMP result. Two  
48 LAMP-positive cases with missing RDT results were excluded from the final dataset.

49       For the inference algorithm, we assumed that each ACI was symptomatic and received  
50 treatment, in keeping with local procedures. We further assumed that each ACD was  
51 asymptomatic and received treatment upon identification if a positive RDT result was obtained,

52 in keeping with local procedures. Otherwise, the ACD was assumed to be untreated. In total, 676  
53 cases were symptomatic and treated, 42 cases were asymptomatic and treated, and 57 cases were  
54 asymptomatic and untreated (Fig S1C). The timing of detection was recorded for each case, and  
55 the spatial coordinates of the location of detection was available for 762 cases and missing for 13  
56 cases. At the time of the case investigation, which generally took place within 48 hours of  
57 diagnosis, patients were asked to provide a detailed travel history of all travel outside of their  
58 village within the 8 weeks prior to presentation. The travel locations (country, region, town) and  
59 dates of travel for up to 5 trips were also collected. Due to the at least one week incubation  
60 period needed for *P. falciparum*, only travel in the 1 to 8 weeks prior to presentation was  
61 considered as a potential source for the infection. Local versus imported classification was  
62 determined by the National Malaria Elimination Programme. If a case classification was not  
63 available, we assigned a positive travel history to cases reporting travel outside Eswatini during  
64 the 1 to 8 weeks prior to detection. In total, 55% of cases (n=423) had positive travel histories,  
65 41% (n=316) had negative travel histories, and 4% (n=36) had unknown travel histories (Fig  
66 S1D).

67

68



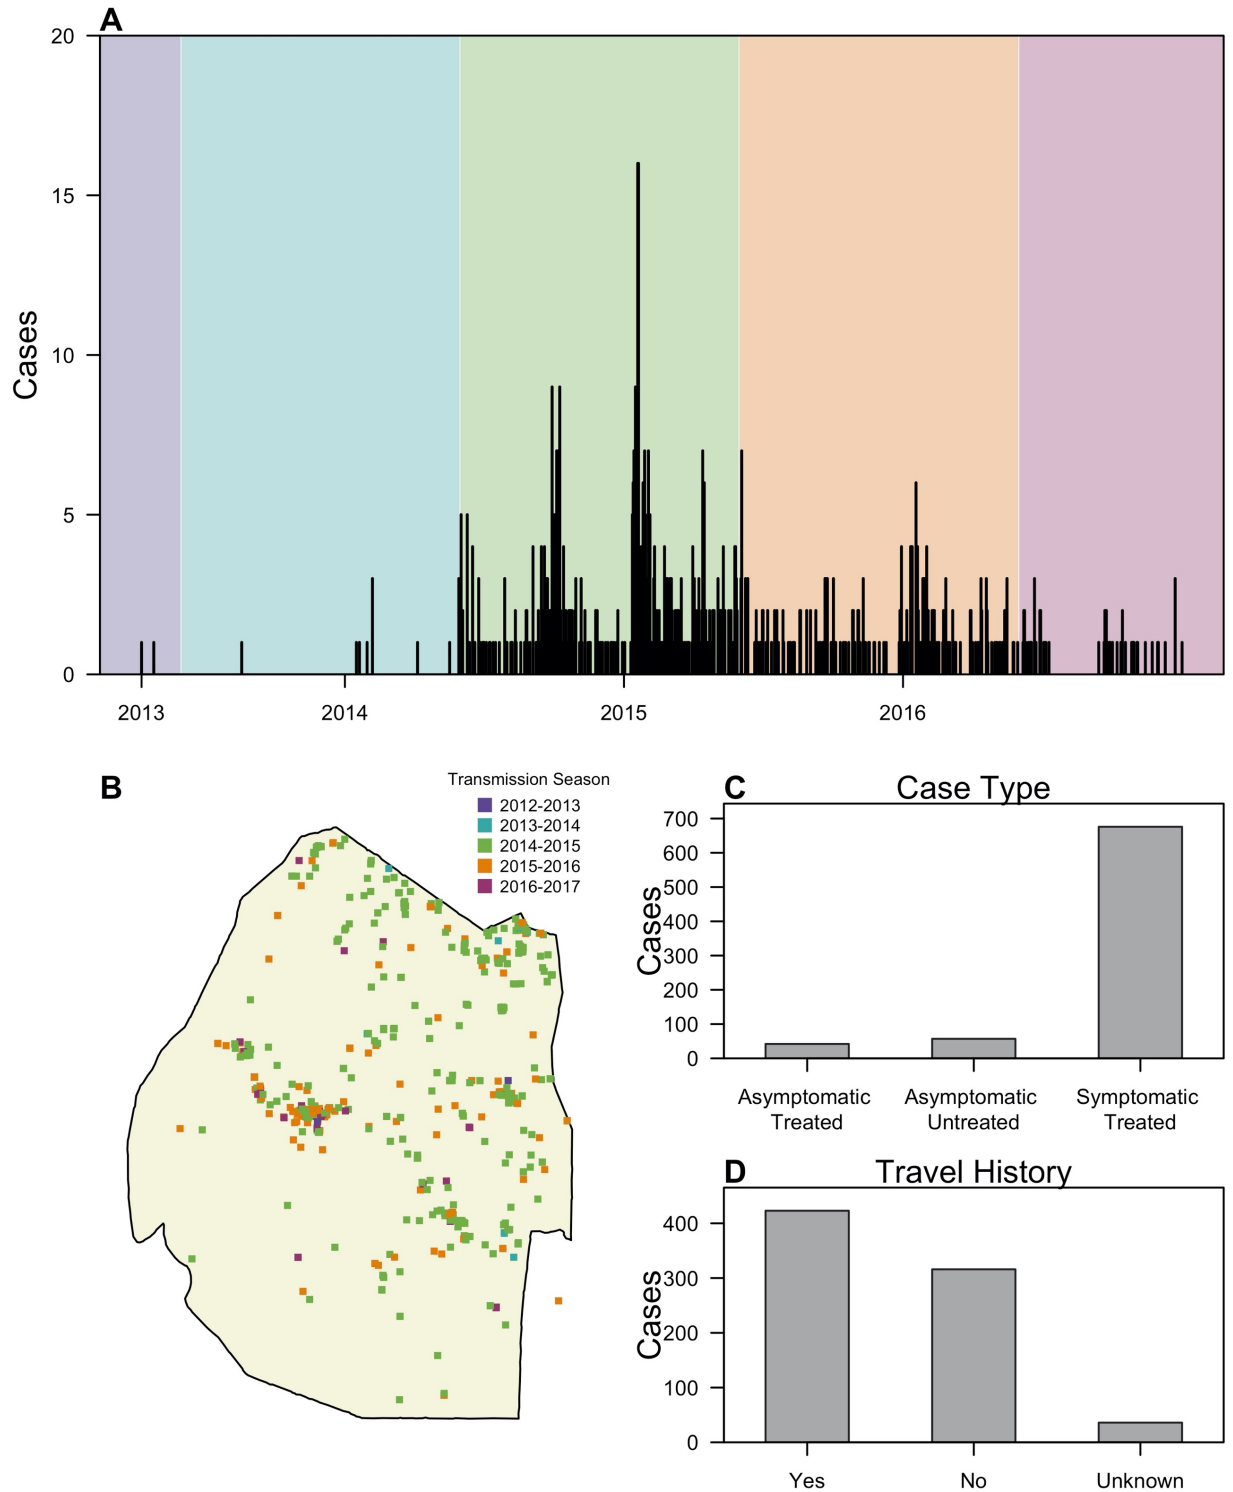

69

70 *S1 Fig. Summary of P. falciparum cases in Eswatini. (A) The time series of cases during 2013-*  
 71 *2016 is shown with the regions color-coded according to the corresponding transmission season.*

72 *The transmission season for each year begins on June 1<sup>st</sup> and ends on May 31<sup>st</sup> of the following*  
73 *year, and case data was available for the 2012-2013 (purple), 2013-2014 (blue), 2014-2015*  
74 *(green), 2015-2016 (orange), and 2016-2017 (maroon) transmission seasons. (B) Cases are*  
75 *mapped according to the location of detection and color-coded by the transmission season*  
76 *during which they were detected. (C) The number of cases that were asymptomatic and*  
77 *untreated, asymptomatic and untreated, and symptomatic and treated is reported. (D) The*  
78 *number of cases that a positive travel history (Yes), a negative travel history (No), or unknown*  
79 *travel history (Unknown) is reported.*

80

## 81 **1.2. Analysis**

### 82 *1.2.1. Validation using a simple test case*

83 To demonstrate the validity of our algorithm in a basic sense, we constructed three idealized test  
84 cases. Each represented a best-case scenario in which we believed that our algorithm should  
85 perform properly if implemented correctly. These involved networks consisting of 20 cases,  
86 where the proportion of imported cases was 5%, 50%, or 90%. To further simplify the inference  
87 exercise, we simulated under a perfectly accurate travel history (i.e.,  $\tau_s = 1$  and  $\tau_l = 0$ ). The serial  
88 interval between cases involved in each local transmission event was fixed at the mean value of  
89 49 days. Furthermore, the spatial arrangement of cases, both within and between outbreaks, was  
90 chosen to represent an ideal transmission network. Specifically, imported cases were distributed  
91 according to a Poisson process within a disk with radius of 100 km, ensuring that outbreaks were  
92 spatially isolated. Moreover, the spatial distribution of nodes within each outbreak was selected  
93 using the Kamada-Kawai algorithm<sup>2</sup> to ensure sufficient spatial separation between cases not  
94 linked by transmission. Finally, we assigned the coordinates of each node such that the spatial  
95 distribution of the nodes was maintained and the distance separating a transmission event was

96 2.5 km. This distance is the mean of a half-normal distribution with variance given a serial  
97 interval of 49 days and a diffusion coefficient of 0.2 (taken as the geometric mean of the upper  
98 and lower bounds of diffusion coefficients considered by Reiner *et al.*<sup>3</sup>).

99 We performed inference on the three simulated data sets under five different  
100 combinations of data types and assumptions about the travel history (S1 Table). These inference  
101 settings used: (1) spatial and temporal data while estimating the accuracy of the travel history  
102 (default setting); (2) spatial and temporal data while believing the travel history (as in Reiner *et*  
103 *al.*<sup>3</sup> and Routledge *et al.*<sup>4</sup>); (3) spatial and temporal data alone; (4) temporal data while  
104 estimating the accuracy of the travel history; and (5) temporal data while believing the travel  
105 history (as in Routledge *et al.*<sup>5</sup>). We then measured the accuracies of case classification as  
106 imported or locally acquired, identifying a transmission linkage, identifying the correct outbreak  
107 of each locally acquired case, and estimating  $R_c$ .

108

109

110 **S1 Table. Summary of inference settings used.**

| Inference Setting | Spatial Data | Temporal Data | Travel-History Data |         |        |
|-------------------|--------------|---------------|---------------------|---------|--------|
|                   |              |               | Estimate Accuracy   | Believe | Ignore |
| 1 (Default)       | X            | X             | X                   |         |        |
| 2                 | X            | X             |                     | X       |        |
| 3                 | X            | X             |                     |         | X      |
| 4                 |              | X             | X                   |         |        |
| 5                 |              | X             |                     | X       |        |

111 *The choice of data types and assumptions about the travel history are provided for each of the*  
 112 *five inference settings considered. For each setting, an “X” indicates that corresponding data*  
 113 *type was included or assumption about the travel history was made.*

114

115 *1.2.2. Application to Eswatini surveillance data*

116 After validating our algorithm using a simple test case, we applied it to malaria surveillance data  
 117 from Eswatini. These data consist of household location, timing of clinical presentation, the  
 118 presence or absence of symptoms, treatment status, and self-reported travel histories of 775 cases  
 119 investigated by the National Malaria Elimination Programme of Eswatini during 2013-2017.

120 To determine how transmission network inferences depended on the inclusion of various  
 121 data types and assumptions about travel-history accuracy, we applied our algorithm to the  
 122 Eswatini surveillance data under the five different inference settings outlined in S1 Table. After  
 123 assessing convergence, we examined the sensitivity of parameter estimates and the inferred  
 124 spatial and temporal scales of transmission to these inference settings. Additionally, we  
 125 considered how estimates of epidemiologically relevant quantities, including  $R_c$  and the  
 126 proportion of cases that were imported, depended on these inference settings. We mapped the  
 127 latter two quantities across Eswatini using a generalized additive model with a Gaussian process  
 128 basis function setting using the *mgcv* package in R<sup>6,7</sup>. To ensure that the responses variables were  
 129 approximately Gaussian-distributed, we took the natural logarithm of the individual-level mean

130  $R_c$  estimates for each node, padded by  $10^{-5}$  to account for zeros. Similarly, we transformed the  
131 probability that each case was imported using the approach of Smithson and Verkuilen<sup>8</sup>.

132

### 133 *1.2.3. Validation of inferences from Eswatini*

134 To validate our inferences on Eswatini surveillance data, we applied our algorithm to simulated  
135 data generated using the median posterior parameter estimates inferred from the surveillance data  
136 and evaluated our ability to recover known networks and parameter values. We did this by  
137 simulating under and inferring under the same inference setting, for all five inference settings.  
138 The goal of these exercises was to understand the potential limits of the accuracy of our  
139 inferences on the Eswatini surveillance data, where the true network and parameters were  
140 unknown. As with the simple test case, we measured the accuracy of classifying cases as  
141 imported or locally acquired, inferring transmission linkages, identifying the correct outbreak for  
142 each locally acquired case, and estimating  $R_c$ .

143 For this exercise, we simulated transmission networks and corresponding epidemiological  
144 data (e.g., household location, timing of clinical presentation, etc.) using a branching process  
145 model for which generative processes for spatial, temporal, and travel-history data mirrored the  
146 assumptions used in the formulation of our likelihood. To simulate data using the branching  
147 process, the maximum number of cases (i.e., treated *P. falciparum* infections) and  $R_c$  were first  
148 specified. We then calculated the maximum number of infections based on the probability of  
149 treatment given symptoms (1.0), the probability of treatment given no symptoms (0.42), and the  
150 probability of symptoms (0.87). Each probability was calculated empirically from the Eswatini  
151 data set. The number of imported infections was equal to the product of the maximum number of  
152 infections and the importation proportion (i.e.,  $1 - R_c$ ). We uniformly distributed the imported  
153 infections over a temporal window consistent with that of the Eswatini data set (1361 days), and

154 we randomly sampled the spatial coordinates of these imported infections according to  
155 population density estimates from WorldPop<sup>9</sup>. While the number of treated *P. falciparum*  
156 infections was less than the specified maximum number of cases, we sampled the number of  
157 offspring from each node according to a Poisson distribution with a mean of  $R_c$ . For each  
158 offspring, the timing and location of detection were sampled relative to the timing and location  
159 of detection of the parent using the spatial and temporal kernels formulated in the likelihood.  
160 Travel histories for imported and locally acquired cases were Bernoulli trials with probabilities  
161 of  $\tau_s$  and  $\tau_l$ , respectively, the symptom status of each case was a Bernoulli trial with the  
162 probability of symptoms, and the treatment status of each was a Bernoulli trial with either the  
163 probability of treatment given symptoms or the probability of treatment given no symptoms.

164 Each simulated data set was generated to approximate characteristics of the Eswatini  
165 surveillance data along with inferred parameters from the model. Specifically, the number of  
166 nodes in the simulated data approximated the total number of cases in the Eswatini surveillance  
167 data, and we set the proportion of imported cases ( $p_i$ ), the diffusion coefficient ( $D$ ), and the  
168 parameters that govern the accuracies of the travel history ( $\tau_s$  and  $\tau_l$ ) to their median values from  
169 the posterior distribution. Similarly, under inference settings where the accuracy of the travel  
170 history was not estimated, we assigned  $\tau_s = 1$  and  $\tau_l = 0$ , implying perfectly accurate travel  
171 histories. To match the observation from surveillance data that individuals who reported travel  
172 tended to be located in metropolitan areas, we distributed the imported cases spatially  
173 proportional to gridded population density estimates from WorldPop<sup>10</sup>.

174

175

176 *1.2.4. Simulation Sweep*

177 To identify the epidemiological parameters that affect the accuracy of reconstructing  
178 transmission networks using routinely collected surveillance data, we performed a simulation  
179 sweep in which we varied the following epidemiological parameters: (1) the diffusion  
180 coefficient, (2) the proportion of imported infections, (3) the temporal window over which  
181 imported infections were distributed, (4) the degree of spatial clustering among imported  
182 infections<sup>11</sup>, (5)  $\tau_s$ , and (6)  $\tau_l$ . We sampled 2,000 values for each epidemiological parameter  
183 using a Sobol design (S2 Table)<sup>12</sup>. We then parameterized a branching process model with each  
184 parameter set to generate a total of 2,000 simulated data sets, each comprising a transmission  
185 network of 200 nodes. The number of nodes in each simulated data set was less than the number  
186 of nodes in the Eswatini surveillance data and was selected to reduce computational burden.  
187 Nevertheless, the relative epidemiological features of the transmission network should affect the  
188 accuracy of network reconstruction more so than the size of the network itself. Therefore, we  
189 expect that the results of this simulation sweep should generalize to networks of various sizes.

190

191 **S2 Table. Parameter ranges for the simulation sweep.**

| <b>Parameter</b>                        | <b>Range</b> |
|-----------------------------------------|--------------|
| Diffusion Coefficient                   | (0,30]       |
| Proportion of cases that are imported   | (0,1]        |
| Maximum date of an imported case (days) | (0, 9125]    |
| Degree of clustering of imported cases  | (0,1]        |
| $\tau_s$                                | [0,1]        |
| $\tau_l$                                | [0,1]        |

192 *The parameters and their respective ranges are reported. A Sobol design was used to sample*  
193 *2,000 parameter values from the respective range and generate simulated data sets<sup>12</sup>.*

194

195 We applied our inference algorithm under three inference settings to each simulated data  
196 set and measured the accuracy of reconstructing transmission networks. The three inference  
197 settings used: (1) spatial and temporal data while estimating the accuracy of the travel history  
198 (default setting); (2) spatial and temporal data while believing the travel history; and (3) spatial  
199 and temporal data alone (S1 Table). We chose to use those inference settings, because they  
200 included each of the three assumptions about travel-history data. As with previous validation  
201 exercises, we measured the accuracy of classifying cases as imported or locally acquired,  
202 inferring transmission linkages, identifying the correct outbreak of each locally acquired case,  
203 and estimating  $R_c$ . We then examined how each of these accuracy metrics varied as a function of  
204 the epidemiological parameters.

205

## 206 **2. Results**

### 207 **2.1. Validation using a simple test case**

208 We first validated our approach on three small, simulated networks of twenty nodes. Although  
209 these networks varied in their proportion of imported cases, the local transmission chains were  
210 arranged to ensure that there was sufficient spatiotemporal separation between transmission  
211 chains, and we simulated perfect travel histories and complete observation of cases, providing  
212 idealized test cases to validate our inference algorithm. We measured the performance of our  
213 inference algorithm in terms of its ability to reconstruct different features of the transmission  
214 network and correctly estimate  $R_c$ . As the proportion of imported cases decreased from 85% to  
215 5%, we found that the ability of the algorithm to correctly classify cases as imported or locally  
216 acquired improved (Fig S2). For example, when we used the default inference setting,  
217 classification accuracy improved from 85.7% (95% Credible Interval: 85.7 – 85.7%) to 100%  
218 (100 – 100%). As classification accuracy improved, our estimates of  $R_c$  also improved, with all



219 five inference settings yielding accurate estimates when imported cases comprised only 5% of  
220 total cases (Fig S2C). Similarly, the ability to identify the correct parent of each locally acquired  
221 case and assign it to the correct outbreak depended on the extent of local transmission in the  
222 network. When 85% of the cases were imported, performance was variable across inference  
223 settings (Fig S2A). Using spatial data and either estimating or ignoring the travel histories, the  
224 algorithm identified a local optimum in the likelihood and consequently classified all locally  
225 acquired cases as imported, leading to highly inaccurate transmission network inferences.  
226 Believing the travel history, regardless of whether spatial data was included, enabled us to  
227 perfectly reconstruct the transmission network, because the travel-history data was simulated to  
228 be perfectly accurate, allowing for correct classification of cases as imported or locally acquired.  
229 However, as the proportion of imported cases decreased, the benefit of believing the travel  
230 history diminished, and using all data types resulted in the greatest accuracy. For example, in the  
231 most extreme case in which only 5% of cases were imported, the accuracy of identifying the true  
232 parent ranged from 84.2% (68.4 – 94.7%) under the default inference settings to 63.2% (47.4 –  
233 78.9%) using temporal data and estimating the accuracy of the travel history (Fig S2C). In terms  
234 of identifying the outbreak to which a case belongs, the algorithm was accurate under all  
235 inference settings, since there was only one outbreak (Fig S2C).

236

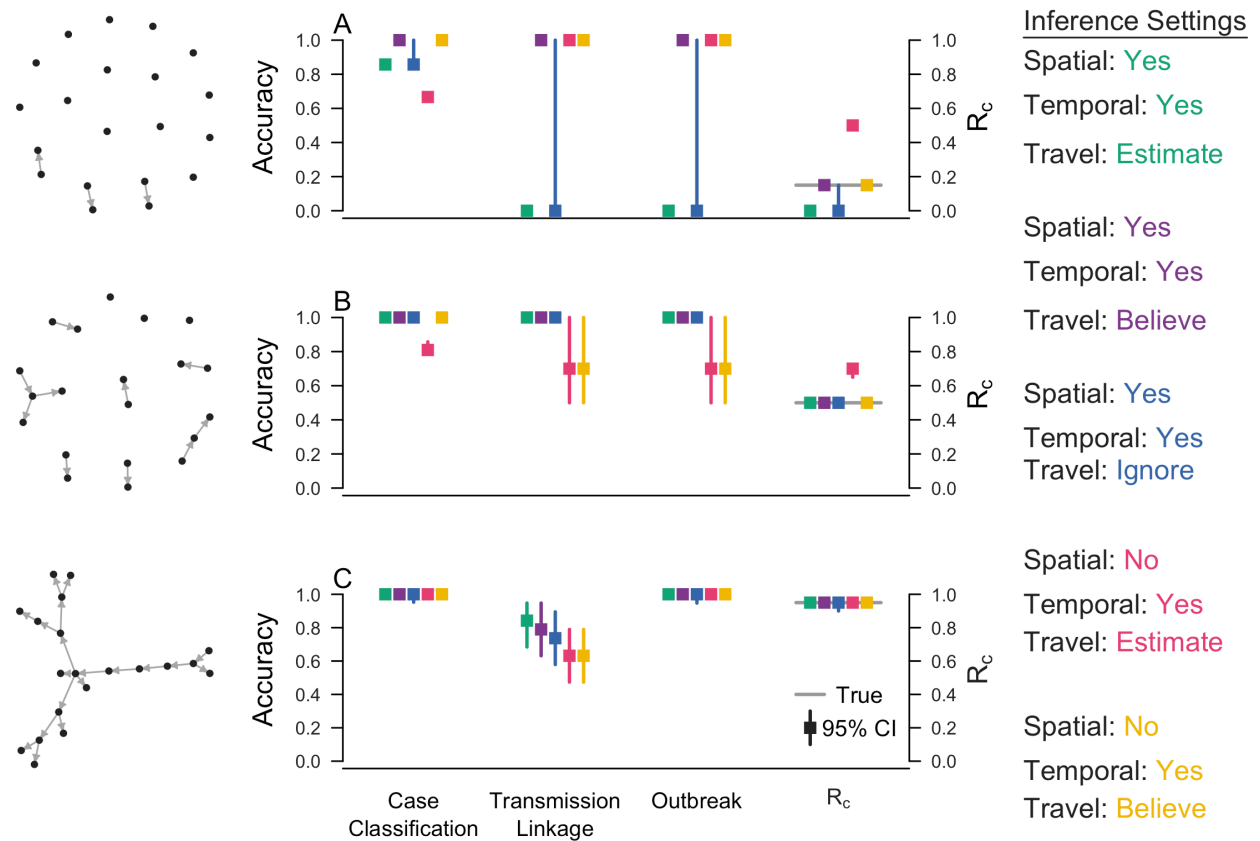

237

238 **S2 Fig. Inference accuracies for three simulated transmission networks with (A) 85%, (B)**  
 239 **50%, and (C) 5% of cases as imported.** Case classification refers to proportion of cases that are  
 240 correctly classified as imported vs. locally acquired. Transmission linkage denotes the  
 241 proportion of locally acquired cases for which the true parent is correctly identified, Outbreak is  
 242 the proportion of locally acquired cases for which the inferred parent belongs to the correct  
 243 outbreak, and  $R_c$  is the estimated reproduction number under control. Square points signify the  
 244 median posterior value, and bars are the 95% credible intervals. The gray line indicates the true  
 245 value of  $R_c$ .

246

247 **2.2. Likelihood Profile of the Diffusion Coefficient**

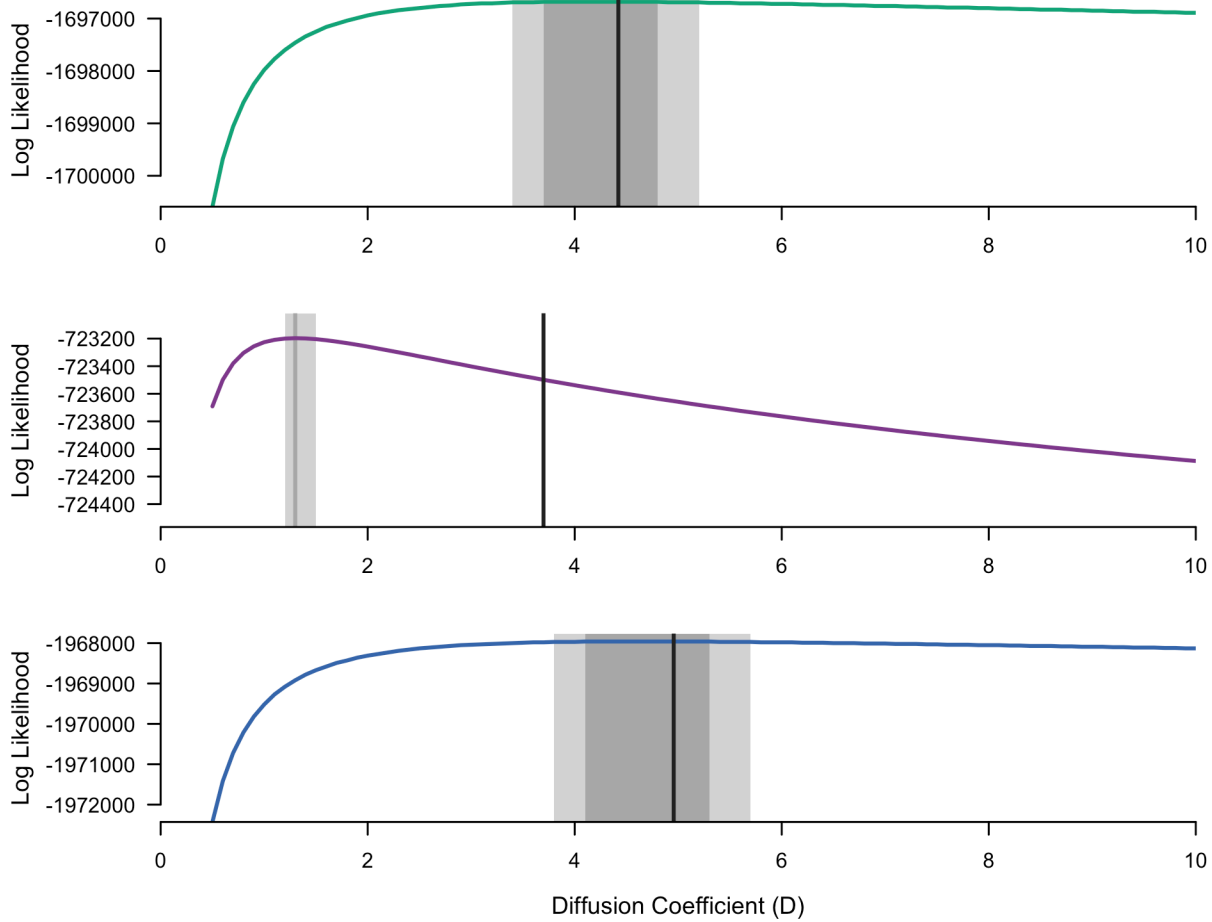

248

249 **S3 Fig. Likelihood profile of the diffusion coefficient conditioning on the true network.** The  
 250 likelihood profile for two inference settings that incorporate spatial data are shown as a function  
 251 of the diffusion coefficient. The green line corresponds to the default inference setting, the purple  
 252 line corresponds to the setting in which spatial and temporal data are used and the travel history  
 253 is believed, and the blue line corresponds to the setting in which spatial and temporal data are  
 254 used and the travel history was ignored. Black bars denote the true value of the diffusion  
 255 coefficient, dark grey shapes denote the region with the maximum likelihood, and light grey  
 256 shapes denote the region within 10 log likelihood units of the maximum likelihood.

257



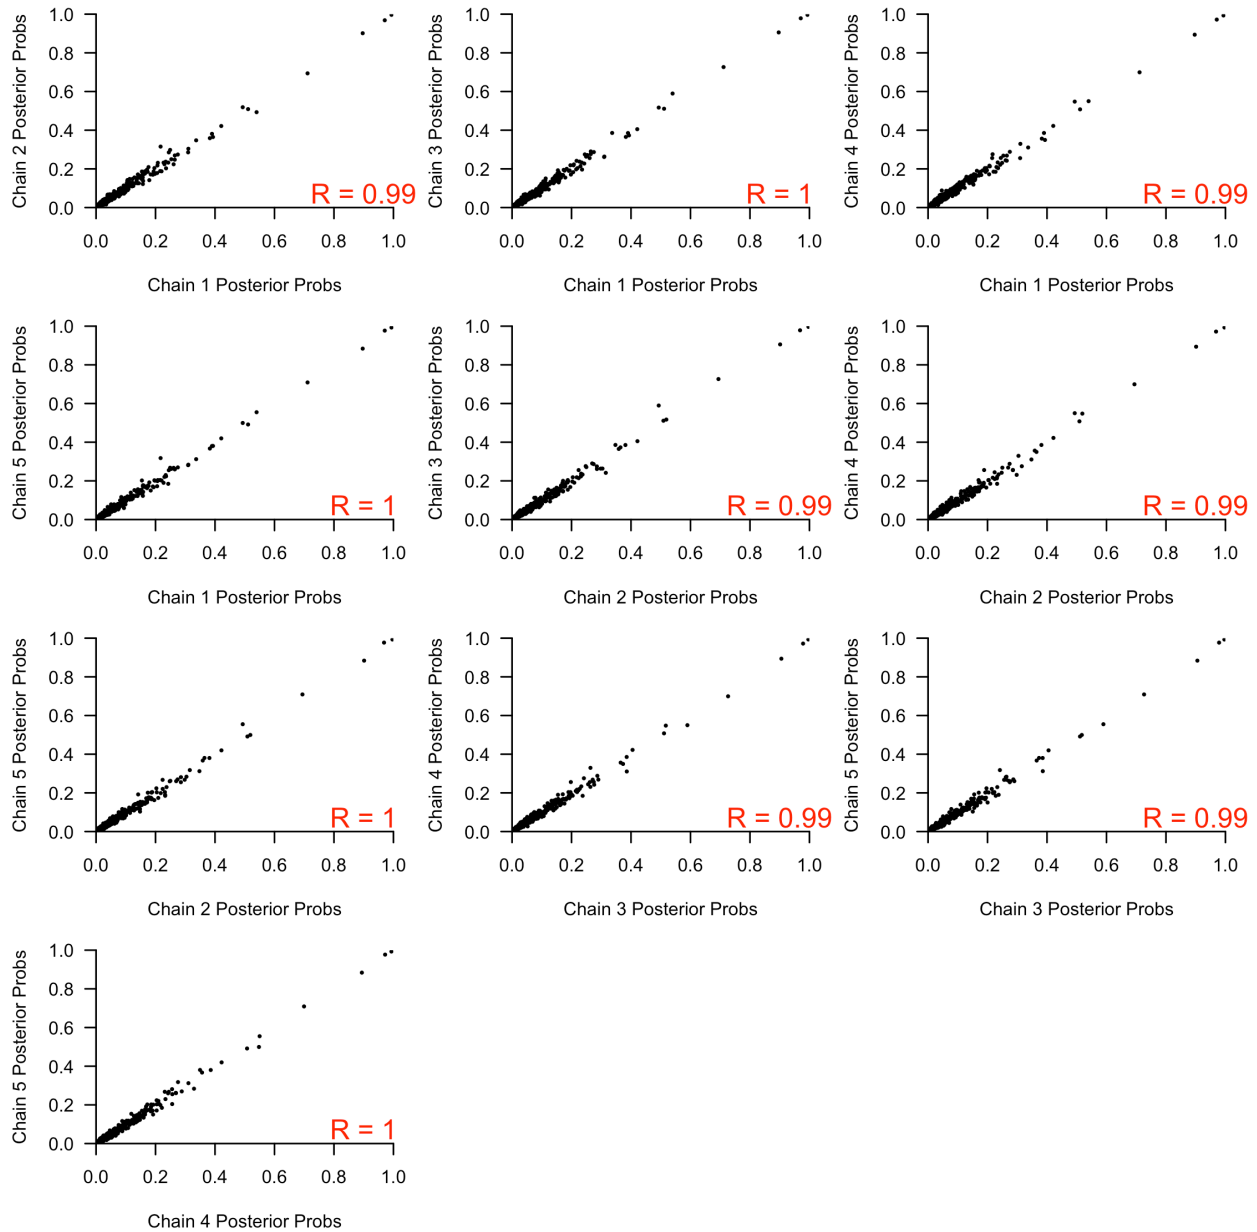

259

260 ***S4 Fig. Comparison of individual-level importation probabilities on Eswatini data under***  
 261 ***default settings. Pairwise scatter plots of importation probabilities are shown for each pairing***  
 262 ***of the 5 independent replicates to assess convergence. The correlation between importation***  
 263 ***probabilities for each pair of replicates is reported in red.***

264

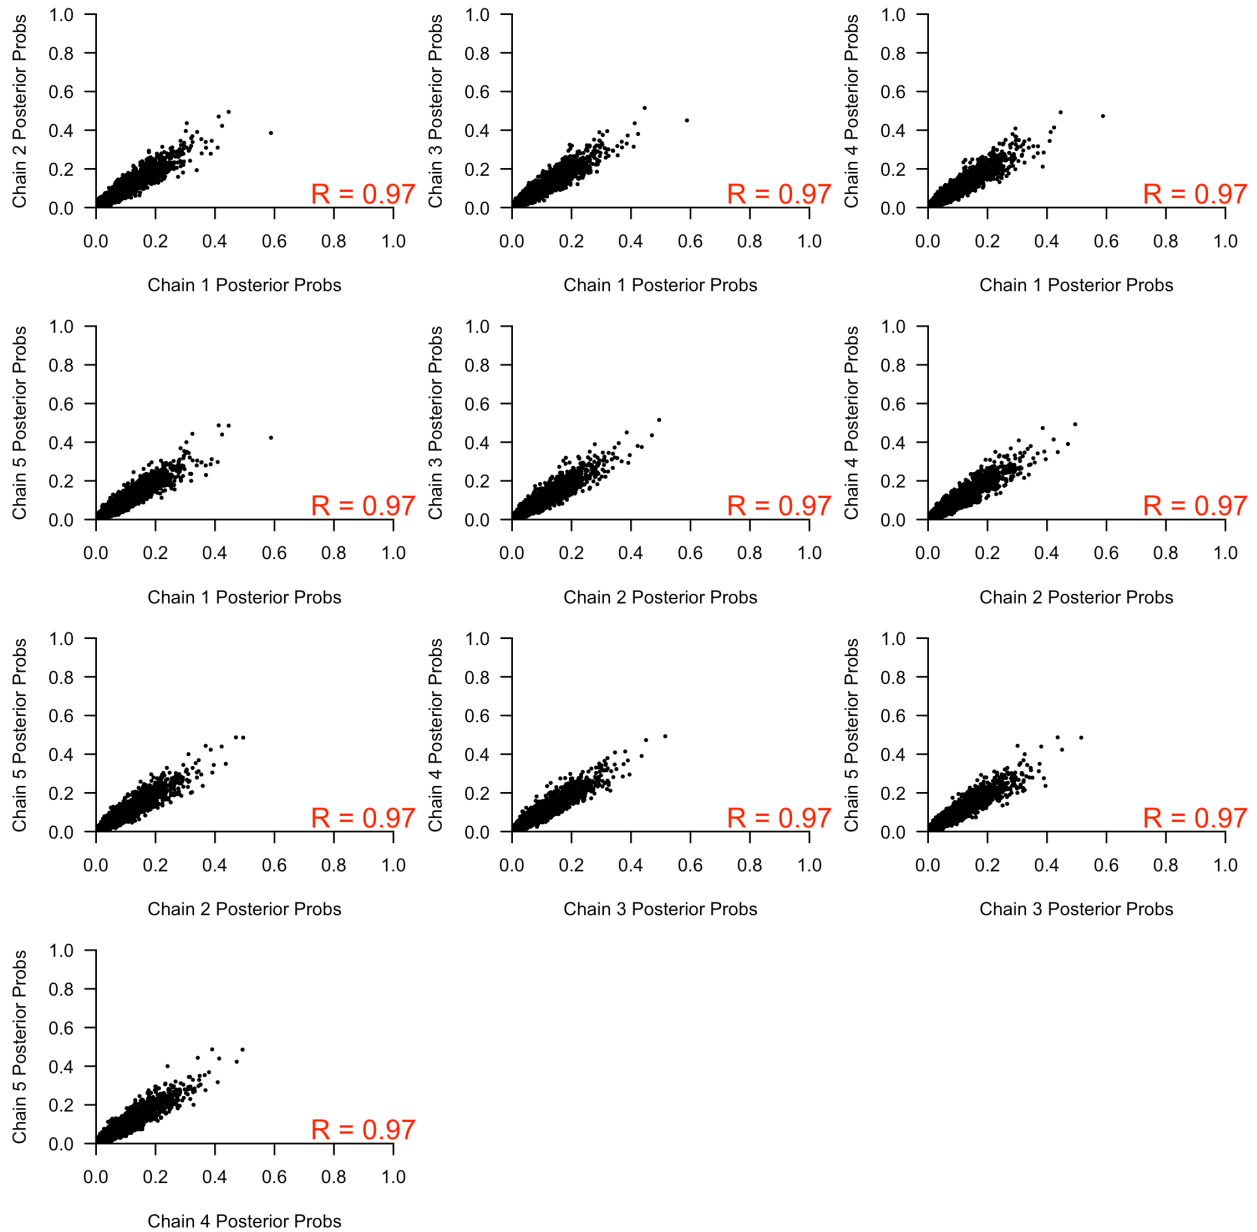

265

266 ***S5 Fig. Comparison of transmission linkage probabilities on Eswatini data under default***

267 ***settings. Pairwise scatter plots of the probability of each transmission linkage are shown for***

268 ***each pairing of the 5 independent replicates to assess convergence. The correlation between***

269 ***transmission linkage probabilities for each pair of replicates is reported in red.***

270

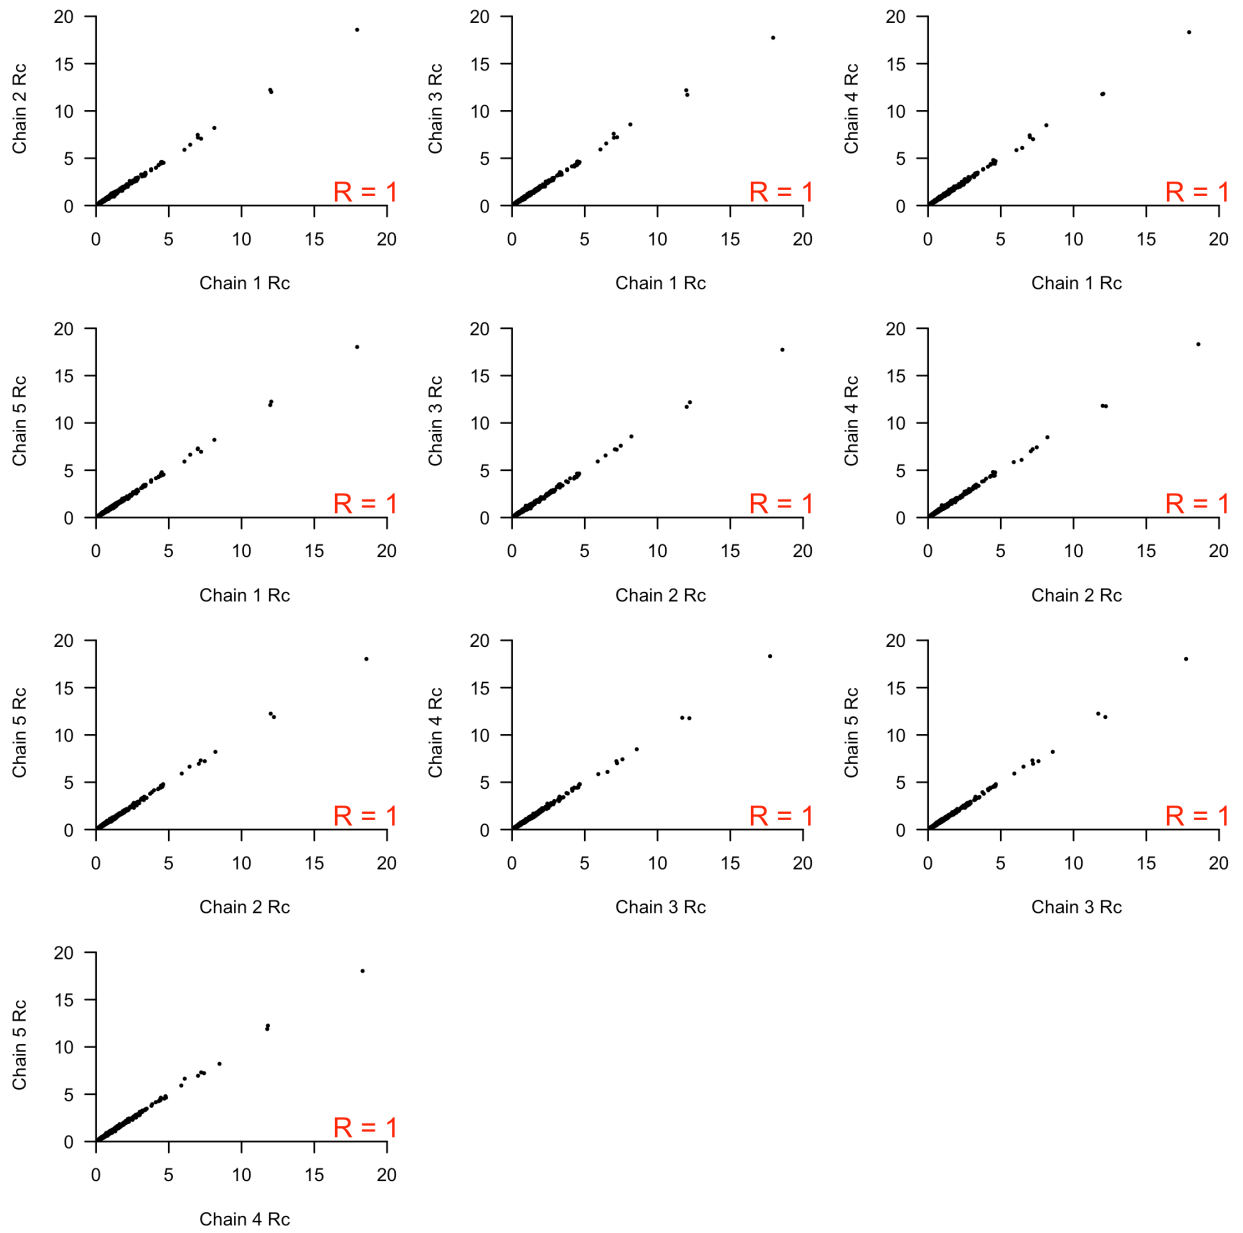

271

272 ***S6 Fig. Comparison of individual-level  $R_c$  estimates on Eswatini data under default settings.***

273 *Pairwise scatter plots of individual-level  $R_c$  are show for each pairing of the five independent*

274 *replicates to assess convergence. The correlation between individual-level  $R_c$  values is reported*

275 *in red.*

276

277 **2.4. Analytical Solution for the Posterior Distribution of  $\tau_s$  and  $\tau_l$**

278 We specified a Bernoulli likelihood and a beta-distributed prior on  $\tau_s$  and  $\tau_l$ . Therefore, the  
279 posterior distributions of  $\tau_s$  and  $\tau_l$  satisfy a conjugate-prior relationship and can be solved  
280 analytically as beta distributions.

281 The prior distribution for  $\tau_s$  is a beta distribution with hyperparameters  $\alpha_s = 12$  and  $\beta_s =$   
282  $3$ , and the prior distribution for  $\tau_l$  is a beta distribution with hyperparameters  $\alpha_l = 3$  and  $\beta_l = 12$ .  
283 Following the conjugate-prior relationship, the posterior distribution for  $\tau_s$  is calculated as a beta  
284 distribution with hyperparameters,

285

286 
$$\hat{\alpha}_s = \alpha_s + \sum_{n_{founders}} \mathbb{I}(report\ travel) \quad (S1)$$

287

288 
$$\hat{\beta}_s = \beta_s + \left( n_{founders} - \sum_{n_{founders}} \mathbb{I}(report\ travel) \right). \quad (S2)$$

289

290 The summation in eq. (S1) is the number of cases that reported travel and are inferred by the  
291 algorithm to be imported cases. Similarly, the second term in eq. (S2) is the number of cases  
292 inferred by the algorithm to be imported cases that did not report travel. The posterior  
293 distribution for  $\tau_l$  is similarly described by a beta distribution with hyperparameters,

294

295 
$$\hat{\alpha}_l = \alpha_l + \sum_{n_{local}} \mathbb{I}(report\ travel) \quad (S3)$$

296



297 
$$\hat{\beta}_l = \beta_l + \left( n_{local} - \sum_{n_{local}} \mathbb{I}(report\ travel) \right). \quad (S4)$$

298

299 In eq. (S3), the summation is the number of cases that reported travel and were inferred by the  
 300 algorithm to be locally acquired. Similarly, the second term in eq. (S4) is the number of cases  
 301 inferred by the algorithm to be locally acquired that did not report travel.

302 We then compared the prior distributions, the posterior distributions obtained from the  
 303 MC3 sampling algorithm, and the posterior distribution obtained using the analytical solutions in  
 304 eqs. (S1-S4) for  $\tau_s$  and  $\tau_l$  inferred from the Eswatini surveillance data. Because each case had a  
 305 posterior probability of being imported or locally acquired but eqs. (S1-S4) required a binary  
 306 classification, we classified a case as imported if the posterior probability of being imported  
 307 exceeded 0.25. This threshold was arbitrarily defined, but the purpose of this exercise is purely  
 308 illustrative.

309 Under both inference settings in which the accuracy of the travel histories was inferred,  
 310 we observed good agreement between the analytical and numerical posterior distributions for  $\tau_s$   
 311 and  $\tau_l$ . Whether or not the posterior distribution deviated from the prior distribution depended  
 312 upon the number of cases that were classified as imported or locally acquired. When there are  
 313 more cases classified as imported, the strength of the data predominated in eqs. (S1-S2), and the  
 314 posterior distribution of  $\tau_s$  deviated from the prior distribution. By contrast, when most cases are  
 315 locally acquired, the posterior distribution of  $\tau_s$  resembled the prior distribution. This is  
 316 consistent with the posterior distributions that we observed when we used spatial and temporal  
 317 data and estimated the accuracy of the travel history versus when we used temporal data and  
 318 estimated the accuracy of the travel history. Using the former, we estimated 5.2% of the cases as

319 imported, which was sufficient to shift the posterior distribution of  $\tau_s$  away from the prior  
320 distribution (S7 Fig). Using the latter, we only estimated 0.13% of cases as imported. This small  
321 number of imported cases implied that the posterior distribution of  $\tau_s$  resembled the prior  
322 distribution (S8 Fig).

323         The derivation of the analytical solution of  $\tau_s$  explains our inability to correctly estimate  
324 this parameter from simulated data (Fig 4B). Using the spatial and temporal data and estimating  
325 the accuracy of the travel history, the true value of  $\tau_s$  was 0.61, and 5.2% of all cases in the  
326 simulated data set were imported. However, applying the MC3 algorithm to this simulated data  
327 set, we inferred only ~1% of all cases to be imported. Consequently, we do not estimate a  
328 sufficient number of imported cases to shift the posterior distribution of  $\tau_s$  away from the prior  
329 distribution and correctly estimate this parameter (S9 Fig).

330

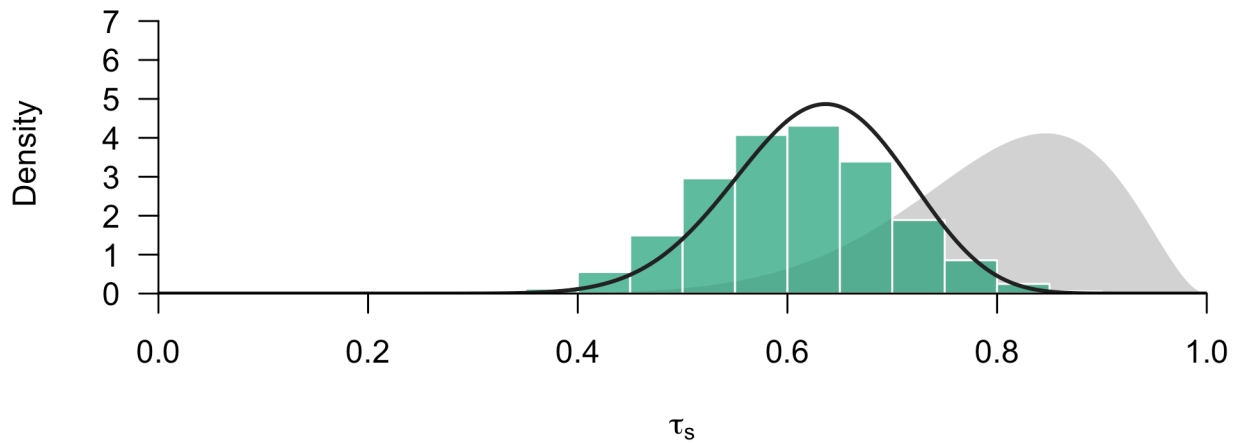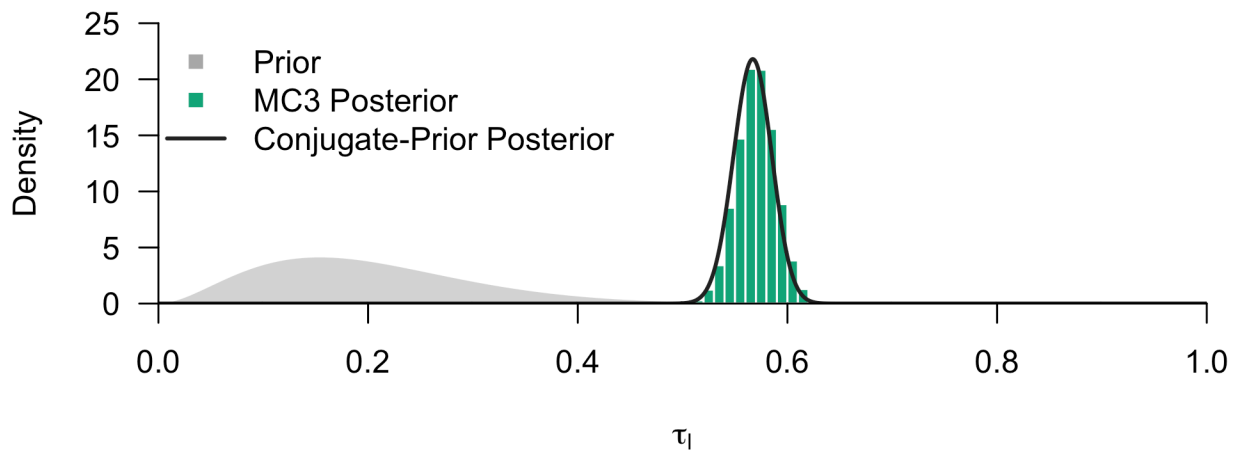

331

332 *S7 Fig. Comparison of the prior and posteriors of  $\tau_s$  and  $\tau_l$  from the Eswatini surveillance data*

333 *using spatial and temporal data and estimating the accuracy of the travel history. The prior*

334 *(gray shape), the analytical posterior distribution (black line), and the numerical posterior*

335 *distribution from MC3 (green histogram) are plotted for  $\tau_s$  and  $\tau_l$ .*

336

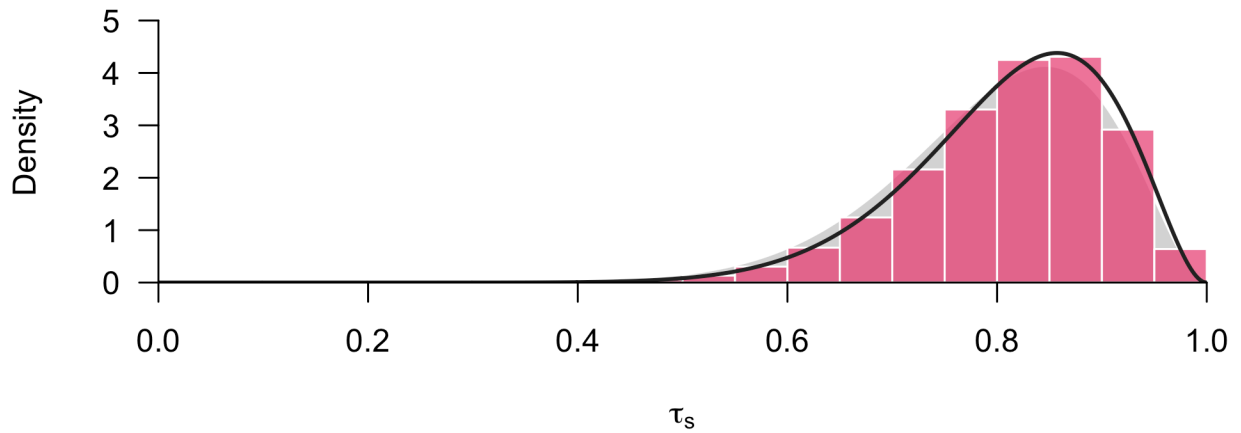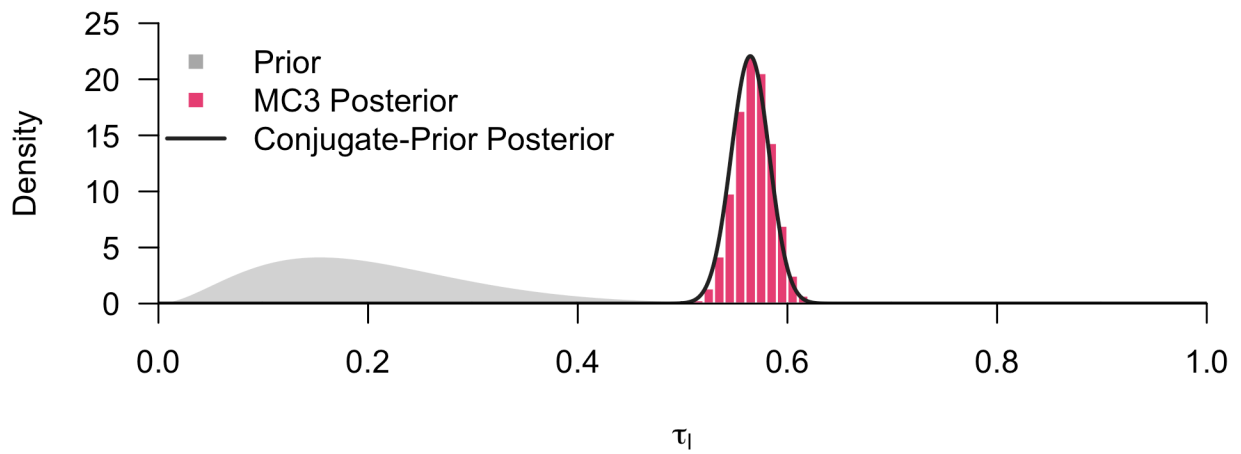

337

338 *S8 Fig. Comparison of the prior and posteriors of  $\tau_s$  and  $\tau_l$  from the Eswatini surveillance data*

339 *using temporal data and estimating the accuracy of the travel history. The prior (gray shape),*

340 *the analytical posterior distribution (black line), and the numerical posterior distribution from*

341 *MC3 (pink histogram) are plotted for  $\tau_s$  and  $\tau_l$ .*

342

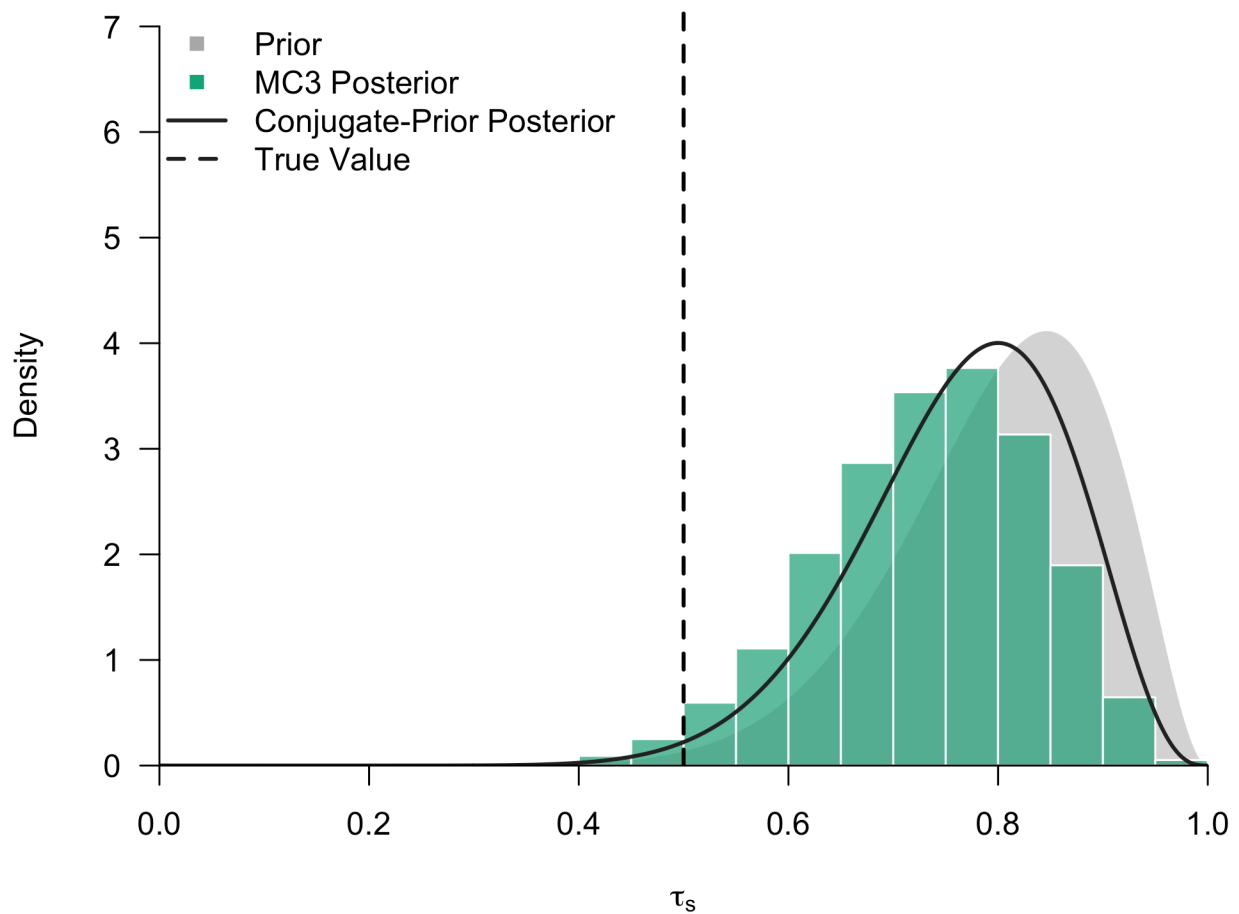

343

344 *S9 Fig. Comparison of the prior and posteriors of  $\tau_s$  from simulated data using spatial and*  
 345 *temporal data and estimating the accuracy of the travel history. The prior (gray shape), the*  
 346 *analytical posterior distribution (black line), and the numerical posterior distribution from MC3*  
 347 *(green histogram) are plotted for  $\tau_s$ .*

348

349 **2.5. Simulation Sweep**

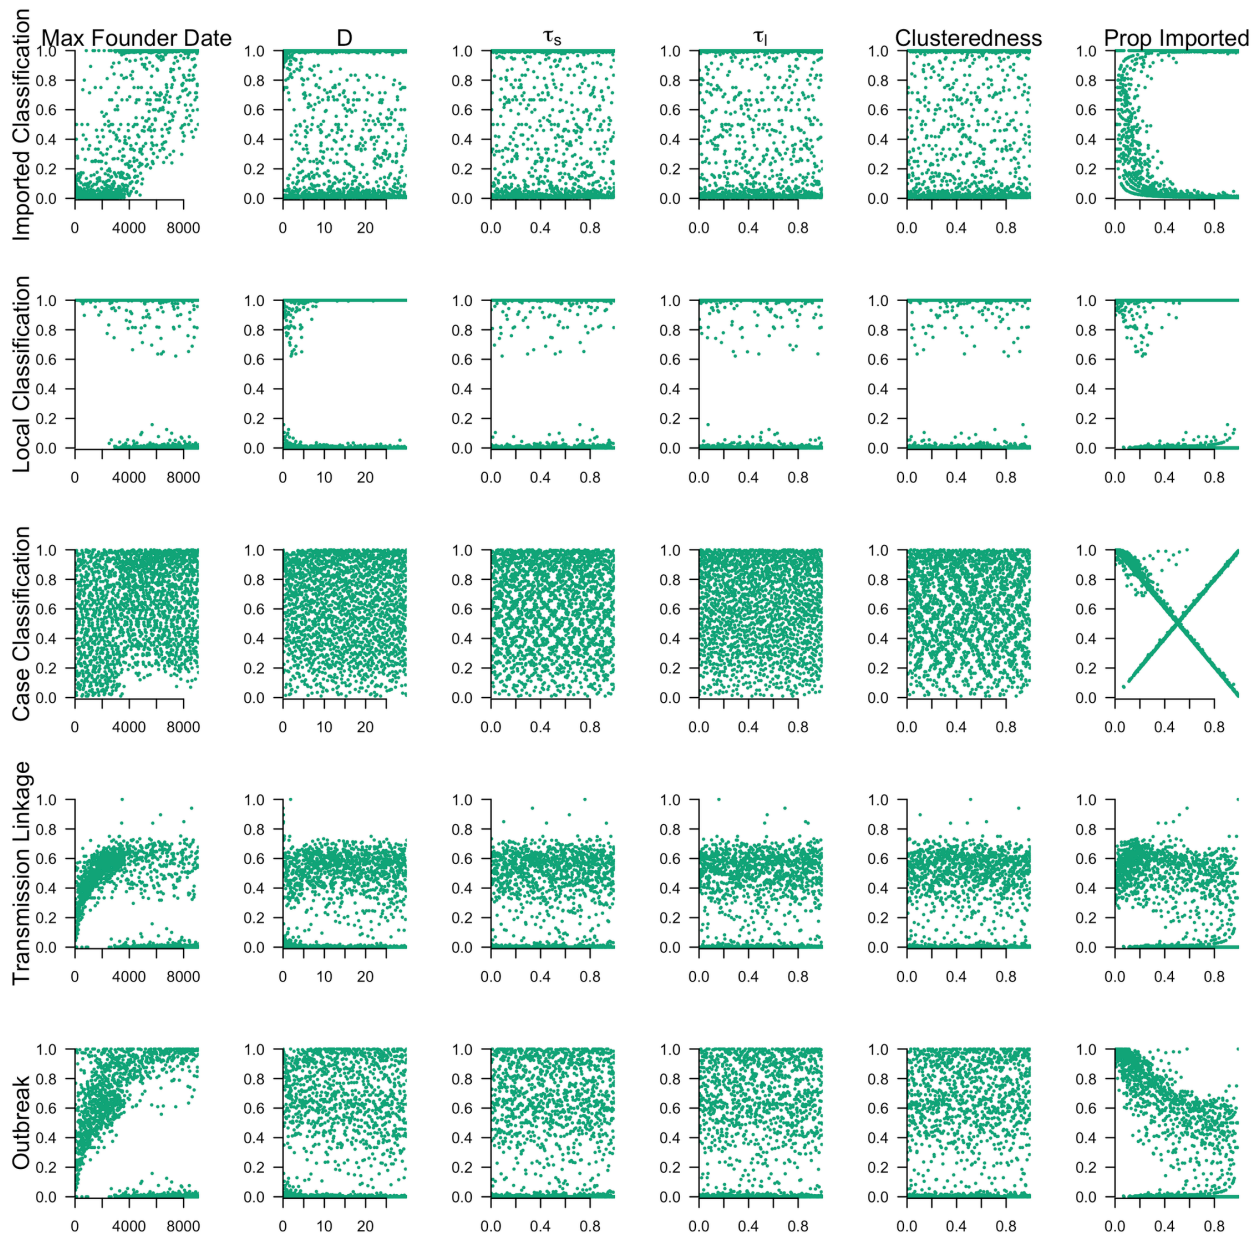

350

351 *S10 Fig. Univariate relationships between accuracy metrics and simulation parameters using*

352 *spatial and temporal data and estimating the accuracy of the travel history. Scatterplots of the*

353 *relationship between five accuracy metrics and the simulation parameters are reported.*

354 *Imported classification refers to the proportion of imported cases that are correctly classified as*

355 *imported, local classification refers to the proportion of locally acquired cases that are correctly*

356 *classified as locally acquired, and case classification refers to the proportion of all cases that*

357 *are correctly classified as imported or locally acquired. Transmission linkage is the proportion*  
358 *of locally acquired cases for which the true parent is correctly identified, and outbreak is the*  
359 *proportion of locally acquired cases for which the inferred parent belongs to the same outbreak.*  
360

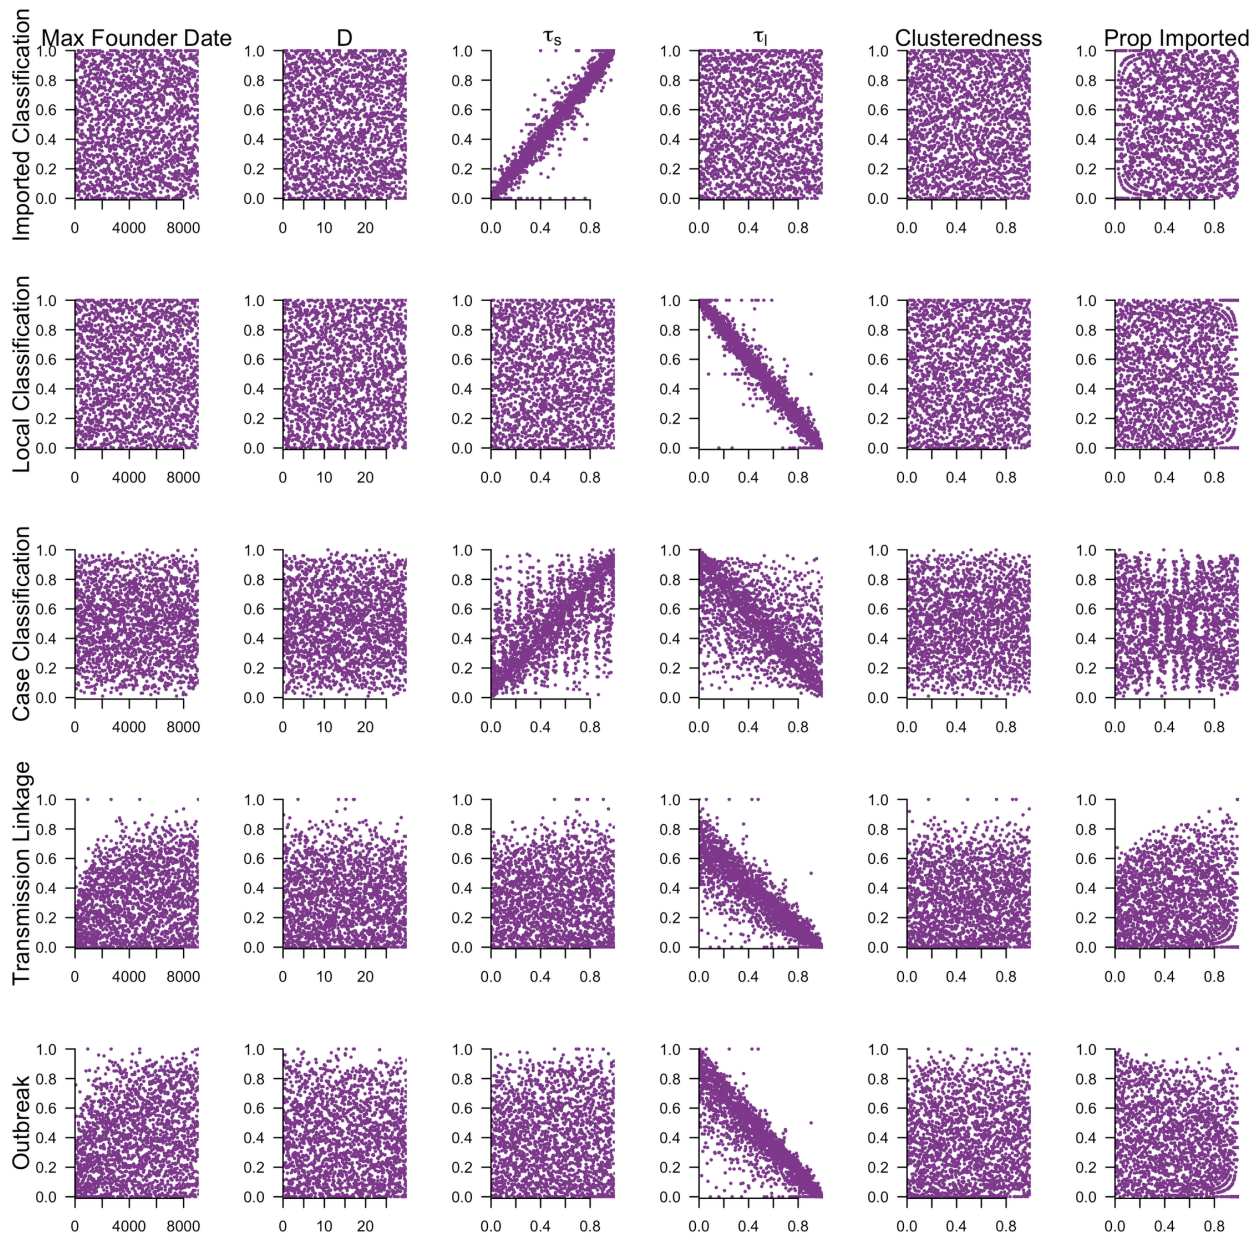

361

362 *S11 Fig. Univariate relationships between accuracy metrics and simulation parameters using*

363 *spatial and temporal data and believing the travel history. Scatterplots of the relationship*

364 *between five accuracy metrics and the simulation parameters are reported. Imported*

365 *classification refers to the proportion of imported cases that are correctly classified as imported,*

366 *local classification refers to the proportion of locally acquired cases that are correctly classified*

367 *as locally acquired, and case classification refers to the proportion of all cases that are correctly*



368 *classified as imported or locally acquired. Transmission linkage is the proportion of locally*  
369 *acquired cases for which the true parent is correctly identified, and outbreak is the proportion of*  
370 *locally acquired cases for which the inferred parent belongs to the same outbreak.*  
371

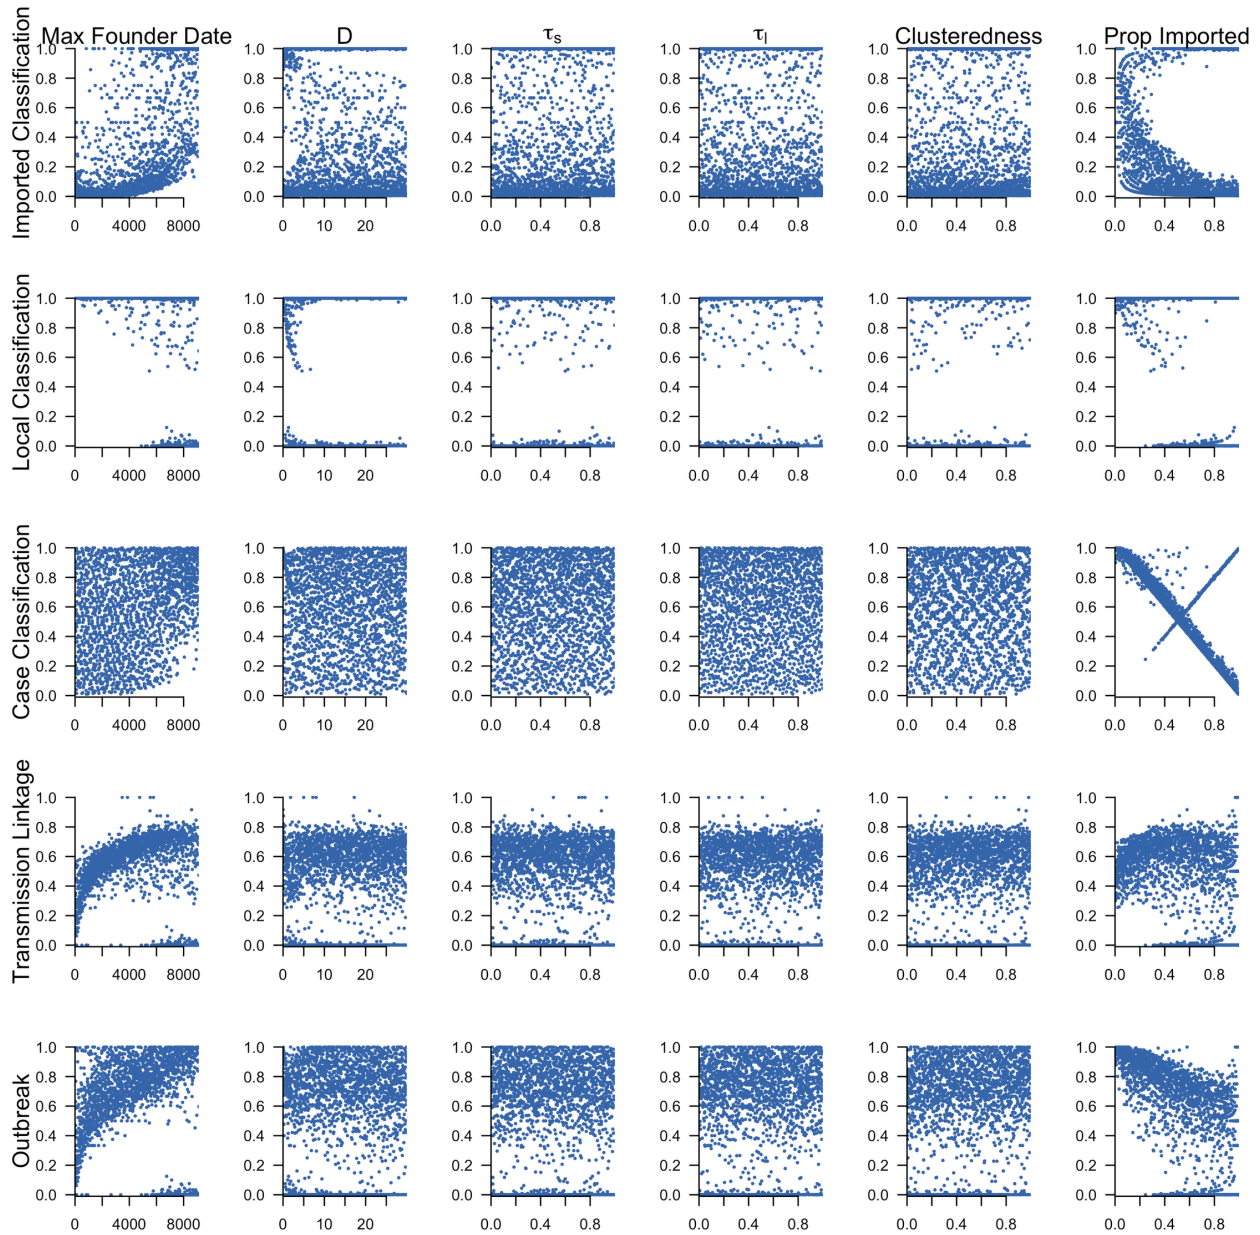

372

373 ***S12 Fig. Univariate relationships between accuracy metrics and simulation parameters using***

374 ***spatial and temporal data only.*** Scatterplots of the relationship between five accuracy metrics

375 *and the simulation parameters are reported. Imported classification refers to the proportion of*

376 *imported cases that are correctly classified as imported, local classification refers to the*

377 *proportion of locally acquired cases that are correctly classified as locally acquired, and case*

378 *classification refers to the proportion of all cases that are correctly classified as imported or*

379 *locally acquired. Transmission linkage is the proportion of locally acquired cases for which the*  
380 *true parent is correctly identified, and outbreak is the proportion of locally acquired cases for*  
381 *which the inferred parent belongs to the same outbreak.*

382

## 383 **2.6. Uncertainty in Higher-Order Summaries of the Network**

384 The credible intervals for higher-order summaries of the network, including case classification

385 and  $R_c$ , are narrow, because the calculation of these higher-order summaries requires that we

386 apply a binary condition to each node in the network (e.g., “Was the node inferred to be imported

387 or locally acquired?”, “Was the inferred parent the true parent?”, etc.) In doing so, we

388 compressed or reduced much of the uncertainty inherent to the inferred network. Because the

389 estimates of  $R_c$  depend only upon the case classification, we obtained narrow credible intervals

390 for  $R_c$ .

391 To consider this further, we took the posterior distributions from the “Validation of

392 Inferences from Eswatini” analysis and compared the log-likelihoods that each case was

393 imported or locally acquired. For each of the three inference settings examined (S13-S15 Figs),

394 the log-likelihood that each case was locally acquired was generally higher, because, in each

395 simulated network, there were 775 cases over 1361 days. This ensured that there was generally a

396 plausible observed parent that occurred within one serial interval prior to each case. The log-

397 likelihood that a case was imported was higher for asymptomatic cases than symptomatic cases,

398 because the serial interval distribution was more diffuse for asymptomatic cases<sup>13</sup>. Although this

399 effect is sensitive to our assumption about the different serial interval distribution for

400 symptomatic and asymptomatic cases, the calculation of the serial interval distributions was

401 informed by empirical data collected in Zanzibar and modeled asexual parasite densities obtained

402 from a validated, within-host model of *P. falciparum* infection.

403

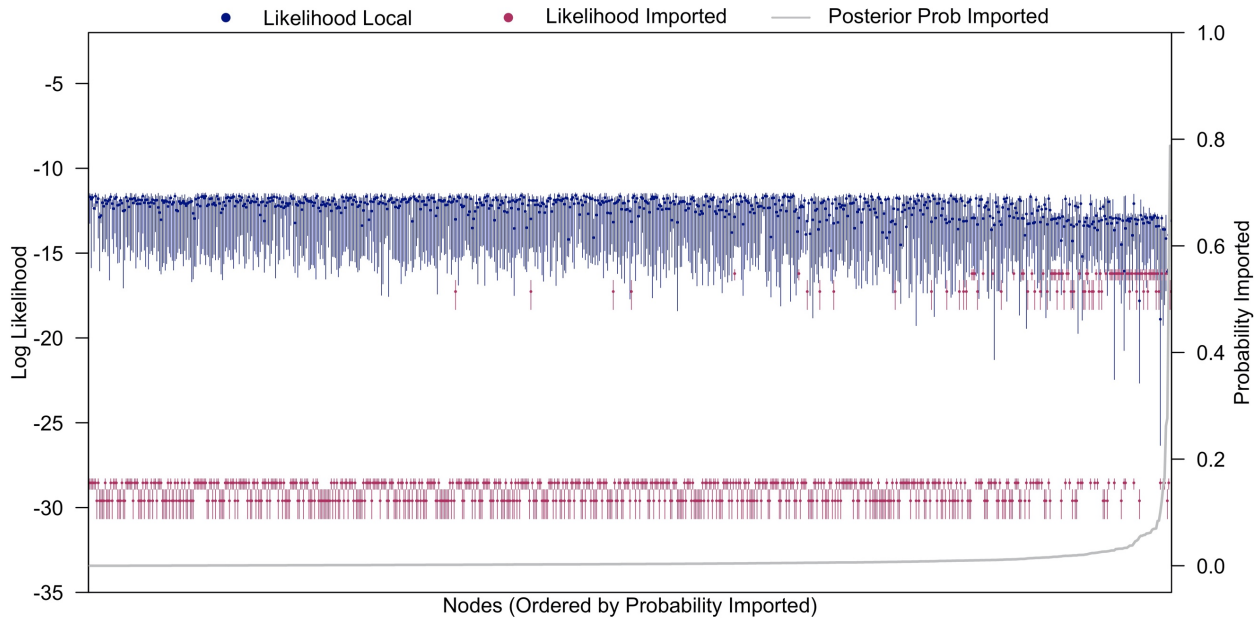

404

405 ***S13 Fig. Likelihoods of case classification simulated nodes using spatial and temporal data***  
406 ***and estimating the accuracy of the travel history. The log likelihoods that each node is locally***  
407 ***acquired (navy) or imported (maroon) is calculated for each network from the posterior***  
408 ***distribution. Points are the median estimate across the full posterior distribution, and segments***  
409 ***are the 95% credible intervals. The gray line is the posterior probability that each node was***  
410 ***imported, and the nodes are ordered by increasing posterior probability of importation.***

411

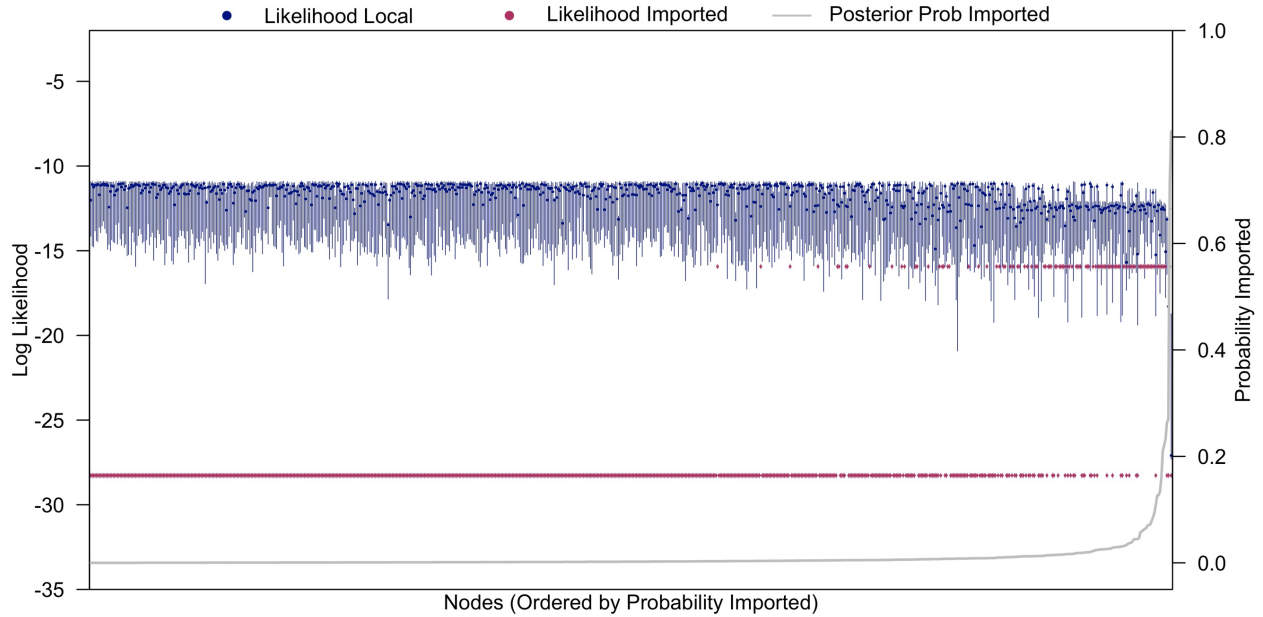

412  
 413 **S14 Fig. Likelihoods of case classification simulated nodes using spatial and temporal data**  
 414 **only.** The log likelihoods that each node is locally acquired (navy) or imported (maroon) is  
 415 calculated for each network from the posterior distribution. Points are the median estimate  
 416 across the full posterior distribution, and segments are the 95% credible intervals. The gray line  
 417 is the posterior probability that each node was imported, and the nodes are ordered by  
 418 increasing posterior probability of importation.  
 419

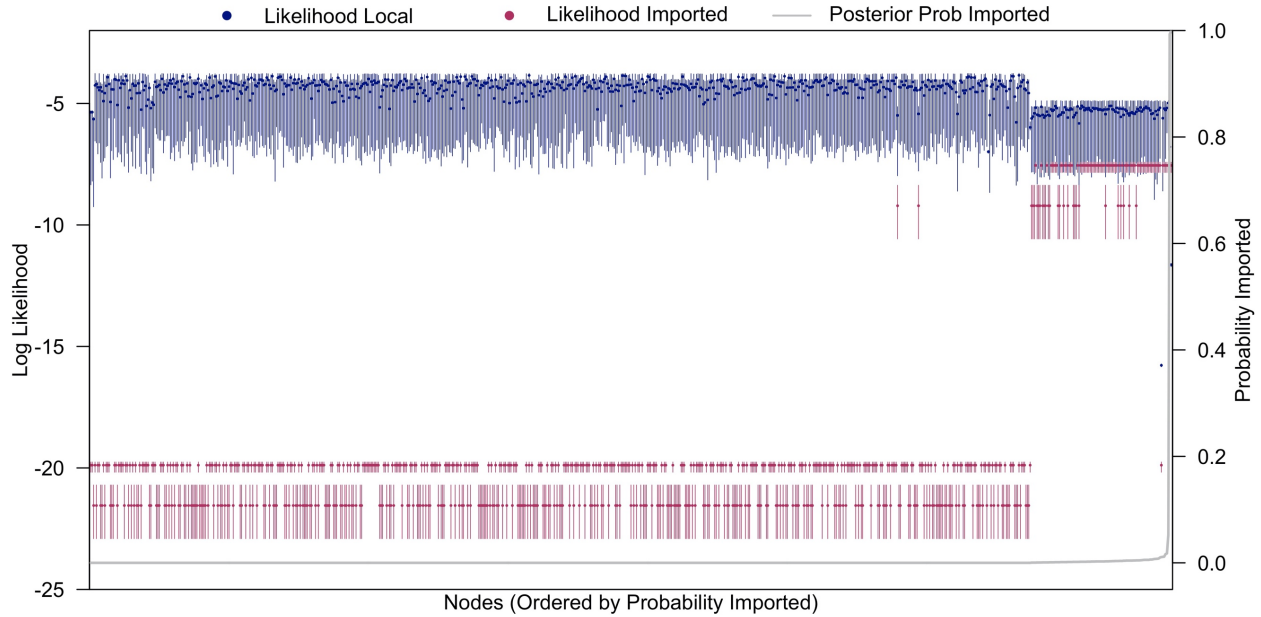

420

421 ***S13 Fig. Likelihoods of case classification simulated nodes using temporal data and***  
 422 ***estimating the accuracy of the travel history. The log likelihoods that each node is locally***  
 423 ***acquired (navy) or imported (maroon) is calculated for each network from the posterior***  
 424 ***distribution. Points are the median estimate across the full posterior distribution, and segments***  
 425 ***are the 95% credible intervals. The gray line is the posterior probability that each node was***  
 426 ***imported, and the nodes are ordered by increasing posterior probability of importation.***

427

### 428 **3. References**

429

430 1. Churcher, T. S. *et al.* Measuring the path toward malaria elimination. *Science* **344**, 1230–  
 431 1232 (2014).

432 2. Kamada, T. & Kawai, S. An algorithm for drawing general undirected graphs. *Information*  
 433 *Processing Letters* **31**, 7–15 (1989).

434 3. Reiner, R. C. *et al.* Mapping residual transmission for malaria elimination. *eLife* **4**, (2015).

- 435 4. Routledge, I. *et al.* Tracking progress towards malaria elimination in China: Individual-level  
436 estimates of transmission and its spatiotemporal variation using a diffusion network  
437 approach. *PLoS Comput Biol* **16**, e1007707 (2020).
- 438 5. Routledge, I. *et al.* Estimating spatiotemporally varying malaria reproduction numbers in a  
439 near elimination setting. *Nat Commun* **9**, 2476 (2018).
- 440 6. Wood, S. N. *Generalized additive models: an introduction with R.* (Chapman & Hall/CRC,  
441 2006).
- 442 7. R Development Core Team. *R: A Language and Environment for Statistical Computing.* (R  
443 Foundation for Statistical Computing, 2017).
- 444 8. Smithson, M. & Verkuilen, J. A better lemon squeezer? Maximum-likelihood regression  
445 with beta-distributed dependent variables. *Psychological Methods* **11**, 54–71 (2006).
- 446 9. WorldPop, & Bondarenko, Maksym. Individual Countries 1km UN Adjusted Population  
447 Density (2000-2020). (2020) doi:10.5258/SOTON/WP00675.
- 448 10. Tatem, A. J. WorldPop, open data for spatial demography. *Sci Data* **4**, 170004 (2017).
- 449 11. Baddeley, A., Rubak, E. & Turner, R. *Spatial point patterns: methodology and applications*  
450 *with R.* (CRC Press, Taylor & Francis Group, 2016).
- 451 12. King, A. A., Nguyen, D. & Ionides, E. L. Statistical Inference for Partially Observed Markov  
452 Processes via the R Package **pomp**. *J. Stat. Soft.* **69**, (2016).
- 453 13. Huber, J. H., Johnston, G. L., Greenhouse, B., Smith, D. L. & Perkins, T. A. Quantitative,  
454 model-based estimates of variability in the generation and serial intervals of Plasmodium  
455 falciparum malaria. *Malaria Journal* **15**, (2016).

456
